# Supplementary material for: miR-342-5p Regulates Neural Stem Cell Proliferation and Differentiation Downstream to Notch Signaling in Mice
Source: PubMed Central journal article supplement — Stem Cell Reports. 2017 Mar 23;8(4):1032–45. doi: 10.1016/j.stemcr.2017.02.017 (PMC5390133; doi:10.1016/j.stemcr.2017.02.017), 2017-03-23
Supplement: mmc2.pdf [file mmc2.pdf]

# miR-342-5p Regulates Neural Stem Cell Proliferation and Differentiation Downstream to Notch Signaling in Mice

Fang Gao,<sup>1,2,5</sup> Yu-Fei Zhang,<sup>1,5</sup> Zheng-Ping Zhang,<sup>3,5</sup> Luo-An Fu,<sup>4,5</sup> Xiu-Li Cao,<sup>1</sup> Yi-Zhe Zhang,<sup>1</sup> Chen-Jun Guo,<sup>1</sup> Xian-Chun Yan,<sup>1</sup> Qin-Chuan Yang,<sup>1,2</sup> Yi-Yang Hu,<sup>1</sup> Xiang-Hui Zhao,<sup>2</sup> Ya-Zhou Wang,<sup>2</sup> Sheng-Xi Wu,<sup>2</sup> Gong Ju,<sup>2,\*</sup> Min-Hua Zheng,<sup>1,\*</sup> and Hua Han<sup>1,\*</sup>

<sup>1</sup>Department of Medical Genetics and Developmental Biology

<sup>2</sup>Institute of Neurosciences, Department of Neurobiology, Collaborative Innovation Center for Brain Science, School of Basic Medicine Fourth Military Medical University, Chang-Le Xi Street #17, Xi'an 710032, China

<sup>3</sup>Department of Spinal Surgery, Honghui Hospital, Xi'an Jiaotong University College of Medicine, Xi'an 710054, China

<sup>4</sup>Department of Neurosurgery, Xijing Hospital, Fourth Military Medical University, Xi'an 710032, China

<sup>5</sup>Co-first author

\*Correspondence: [jugong@fmmu.edu.cn](mailto:jugong@fmmu.edu.cn) (G.J.), [minhua\\_zheng@126.com](mailto:minhua_zheng@126.com) (M.-H.Z.), [huahan@fmmu.edu.cn](mailto:huahan@fmmu.edu.cn) (H.H.)

<http://dx.doi.org/10.1016/j.stemcr.2017.02.017>

## SUMMARY

Notch signaling is critically involved in neural development, but the downstream effectors remain incompletely understood. In this study, we cultured neurospheres from *Nestin*-Cre-mediated conditional *Rbp-j* knockout (*Rbp-j* cKO) and control embryos and compared their miRNA expression profiles using microarray. Among differentially expressed miRNAs, miR-342-5p showed upregulated expression as Notch signaling was genetically or pharmaceutically interrupted. Consistently, the promoter of the miR-342-5p host gene, the *Endothelial nitric oxide synthase* (*Endo*), was negatively regulated by Notch signaling, probably through HES5. Transfection of miR-342-5p promoted the differentiation of neural stem cells (NSCs) into intermediate neural progenitors (INPs) in vitro and reduced the stemness of NSCs in vivo. Furthermore, miR-342-5p inhibited the differentiation of neural stem/intermediate progenitor cells into astrocytes, likely mediated by targeting GFAP directly. Our results indicated that miR-342-5p could function as a downstream effector of Notch signaling to regulate the differentiation of NSCs into INPs and astrocytes commitment.

## INTRODUCTION

The mammalian CNS originates from neural stem cells (NSCs) which are multipotential to generate neurons, astrocytes and oligodendrocytes (Temple, 2001). NSCs present as neuroepithelial (NE) cells in early developmental stage and divide symmetrically to expand the neural epithelium (Franco and Muller, 2013; Gage and Temple, 2013; Kriegstein and Alvarez-Buylla, 2009; Merkle and Alvarez-Buylla, 2006; Noctor et al., 2004). Radial glial cells (RGCs) then replace NE cells and divide asymmetrically in the ventricular zone (VZ) of the developing brain to maintain a self-renewing stem cell pool and generate differentiating daughter cells. These daughter cells, defined as intermediate neural progenitors (INPs), migrate radially outward while dividing symmetrically to amplify themselves. Using a time-lapse imaging method, INPs have been shown to accumulate in the subventricular zone (SVZ) (Noctor et al., 2004), although other studies have also shown that INPs coexist with NSCs in the VZ of mouse telencephalon (Mizutani et al., 2007). NSCs and INPs could be distinguished by molecular markers as well as the type of progenies they generate, because INPs have limited differentiation potential compared with NSCs.

The development of NSCs and INPs is regulated by a series of extrinsic and intrinsic elements (Kohwi and Doe, 2013; Shi et al., 2010). Notch signaling mediates adjacent

cell-cell communications. Upon activation by ligands, Notch receptors are processed by protease complexes containing  $\gamma$ -secretase to release the intracellular domain of Notch receptor (NICD). NICD translocates into nucleus and converts the transcription factor RBP-J from a repressor into an activator. The downstream targets regulated by NICD/RBP-J are mainly basic-helix-loop-helix (bHLH) transcription factors, such as the HES family proteins. The Notch pathway regulates multiple steps of NSC and INP development (Pierfelice et al., 2011; Yoon and Gaiano, 2005). Notch signaling promotes RGC identity and maintains their stemness (Gaiano and Fishell, 2002; Gaiano et al., 2000). Notch signaling also inhibits the differentiation of NSCs and INPs into neurons (Hitoshi et al., 2002), and directs several binary fate choices, such as NSCs differentiating into glia versus neurons and glial progenitors differentiating into astrocytes versus oligodendrocytes (Louvi and Artavanis-Tsakonas, 2006; Mizutani et al., 2007; Tanigaki et al., 2001; Zheng et al., 2009). It has been shown that Notch receptors are activated in both NSCs and INPs, but the downstream signals might be mediated in different ways, namely, through RBP-J-dependent signaling in NSCs and RBP-J-independent signaling in INPs (Gao et al., 2009; Mizutani et al., 2007). Knockdown of *Rbp-j* promotes the differentiation of NSCs into INPs, which preferentially differentiated into neurons versus astrocytes, and promotes migration of ventricular progenitor

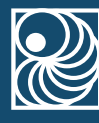

cells to the outside of the cortical plate (Mizutani et al., 2007). We have shown that neurospheres cultured from *Rbp-j* knockout embryonic forebrain contain more INPs in comparison with neurospheres derived from the control littermates that contain more NSCs, demonstrating that RBP-J-dependent Notch signaling inhibits differentiation of NSCs into INPs (Gao et al., 2009). The differentiation of these *Rbp-j*-deleted INPs also showed neurogenic preference against astrocytes. Moreover, Notch signaling is also reported to play a role in the apoptosis of progenitor cells and the maturation of neurons (Sestan et al., 1999; Redmond et al., 2000; Hoeck et al., 2010). However, downstream molecules through which Notch signaling regulates NSCs and neural development have been elusive.

MicroRNAs (miRNAs) are short non-coding RNA molecules that are abundant in the CNS and are crucial for neural development (Bian et al., 2013; Fineberg et al., 2009; Shi et al., 2010). Encouraged by other reports showing that some miRNAs are involved in the regulation of Notch signaling (Boucher et al., 2011; Hamidi et al., 2011; Rose-Koerner et al., 2016), in this study, we cultured neurospheres from E11.5 *Rbp-j* knockout and control embryos and compare their miRNA expression by using microarray hybridization. We found that among several differentially expressed miRNAs, miR-342-5p might be a downstream target of Notch signaling. Overexpression of miR-342-5p could promote the differentiation of NSCs into INPs, and inhibit an astrocyte fate, likely by direct targeting GFAP. Inhibition of miR-342-5p, on the contrary, could maintain the stemness of NSCs impaired by Notch blockade. Our results indicated that miR-342-5p could function as a downstream molecule of Notch signaling to regulate the differentiation of NSCs into INPs, and the commitment into astrocytes.

## RESULTS

### Identification of miR-342-5p as a Downstream Molecule of Notch Signaling in Neural Stem/Intermediate Progenitor Cells

In order to find the downstream miRNAs of Notch signaling, we cultured neurospheres from ganglionic eminence (GE) of *NesCre-Rbp-j<sup>fl/fl</sup>* (*Rbp-j<sup>CKO</sup>*) and *NesCre-Rbp-j<sup>fl/+</sup>* (control) embryos on 11.5 dpc (days post coitus) (Gao et al., 2009). Total RNA was extracted from neurospheres, and their miRNA expression profiles were compared by using miRNA array hybridization. Cluster analysis indicated that a number of miRNAs were differentially expressed between RBP-J-deficient and control neurospheres (Figure 1A). Among these miRNAs, the levels of miR-342-5p and miR-342-3p increased apparently in RBP-J-deficient neurospheres. The genes of miR-342-5p and

miR-342-3p are located in the third intron of *Evl* gene, which has been reported to play a role in neural development (Kwiatkowski et al., 2007; Vanderzalm and Garriga, 2007). We therefore tested the expressions of miR-342-5p, miR-342-3p, and *Evl* in *Rbp-j*-deleted neurospheres by real-time PCR analysis. The attenuated Notch signaling in *Rbp-j*-deleted neurospheres was validated by the decreased expression of *Hes1* and *Hes5*, two bHLH downstream effectors of Notch signaling (Figure 1B). And the expression of miR-342-5p increased 11.67-fold compared with the control (Figure 1B). The expression of the host gene *Evl* also increased significantly. However, the expression of miR-342-3p showed a tendency to increase, but this was not statistically significant (Figure 1B). We therefore focused on miR-342-5p in the following analysis.

In wild-type neurospheres treated with GSI, an inhibitor of Notch activation, the expression of miR-342-5p was upregulated compared with the control (Figure 1C), and the expression of miR-342-3p also increased in this model. These results indicated that the expression of miR-342-5p was increased in neural stem/intermediate progenitor cells (NS/PCs) after Notch signaling was either genetically or pharmaceutically blocked.

The upregulated expression of miR-342-5p and its host gene *Evl* could be a result of altered cell composition in neurospheres with Notch blockade (Mizutani et al., 2007; Gao et al., 2009). To clarify this, we treated neurospheres with GSI for different periods of time, and observed the expression of miR-342-5p and the NSC markers *Nestin* and *Glast*, and the INP marker *Tα1* (Gao et al., 2009). The result showed that the expression of *Nestin* and *Glast* decreased 24 hr after GSI treatment, while the INP marker did not change until 96 hr after GSI treatment. However, the expression of miR-342-5p was upregulated as early as 6 hr after GSI treatment (Figure S1A), suggesting that the upregulation of miR-342-5p after Notch blockade was not a consequence of cell composition change. In addition, we examined the expression of *Nestin*, *Glast*, *Tα1*, and miR-342-5p in neurospheres derived from NSC-specific Notch activation mice (NICD transgene activated by *Nestin-Cre*, see below), and found that while the expression of *Nestin*, *Glast*, and *Tα1* remained unchanged, the level of miR-342-5p was reduced in neurospheres of NICD transgenic mice (Figure S1B). Moreover, to access the relationship between miR-342-5p expression and Notch activation in vivo, we determined the expression of miR-342-5p and *Hes1* and *Hes5* in embryonic day (E15.0) GE and post natal striatum (P0, P20), which is derived from embryonic GE. The results showed that, compared with that of E15.0 GE, the expression of *Hes1* and *Hes5* decreased in P0 and P20 striatum, suggesting lowered Notch activation. Meanwhile, the expression of miR-342-5p and miR-342-3p in P0 and P20 striatum increased compared with that in E15.0 GE,

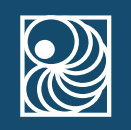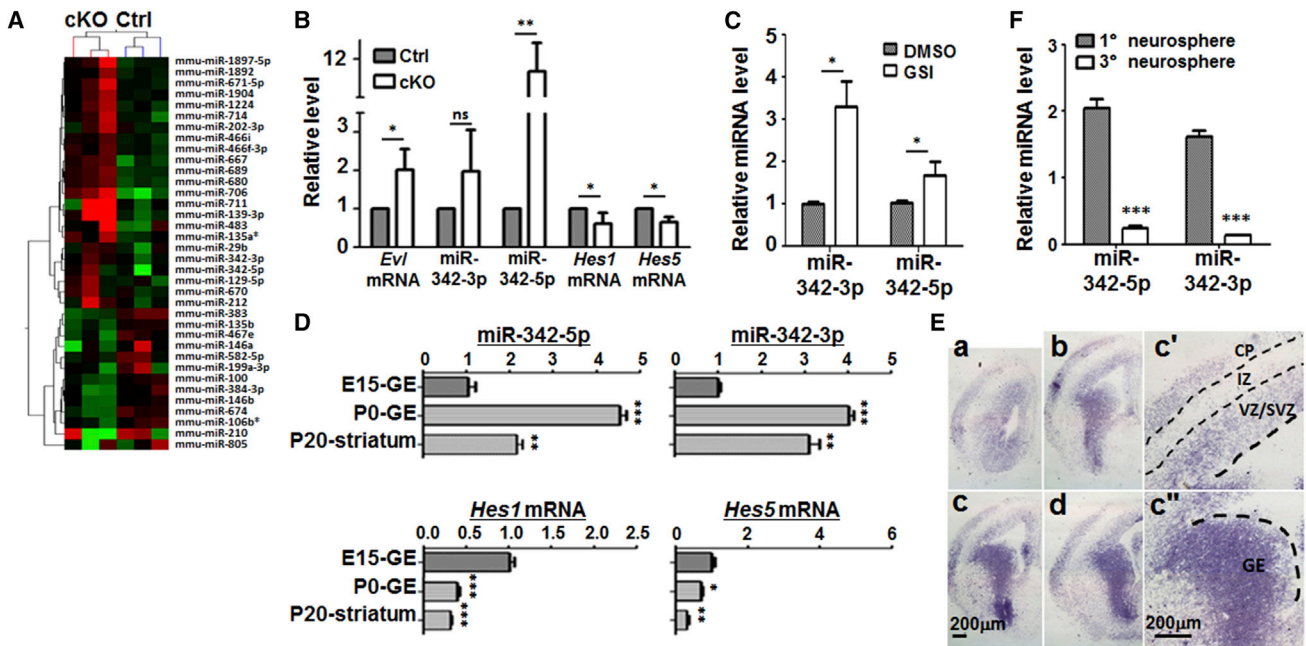

**Figure 1. miR-342-5p Was a Downstream miRNA of the Notch Pathway in NSCs**

(A) Screening of Notch downstream miRNAs using microarray hybridization. Primary neurospheres were cultured with cells derived from the ganglion eminences (GE) of *NesCre-Rbpj<sup>-f/f</sup>* (cKO) and *NesCre-Rbpj<sup>-f/f</sup>* embryos (Ctrl) (E11.5). Differentially expressed miRNAs were compared by using microarray hybridization and clustered. RNA samples were derived from three different pairs of littermates.

(B) The expression of *Evl* mRNA, miR-342-3p, miR-342-5p, *Hes1* mRNA, and *Hes5* mRNA in *Rbpj* cKO and control neurospheres was determined by qRT-PCR. Neurospheres were derived from four different pairs of littermates.

(C) Primary neurospheres were cultured by using cells derived from GE of wild-type embryos (E15.5). Cells were treated with 75  $\mu$ M GSI for 12 hr, and the expression of miR-342-3p and miR-342-5p was examined by qRT-PCR. DMSO was used as a control. RNA samples were extracted from four pairs of GSI- and DMSO-treated neurospheres.

(D) The expression of miR-342-5p, miR-342-3p, *Hes1* mRNA, and *Hes5* mRNA in the GE and striatum during neural development in mice was determined by qRT-PCR. The brain tissues at the specific time point came from four mice.

(E) The expression of miR-342-5p in the telencephalon of E14.5 embryo was determined by in situ hybridization using a locked nucleic acid probe. The brain sections were derived from three different wild-type embryos. (a–d) Coronal sections of E14.5 telencephalon. (c' and c'') The cortex and GE regions of the telencephalon section in (c) are shown in magnification, respectively. VZ, ventricular zone; SVZ, sub-ventricular zone; IZ, intermediate zone; CP, cortical plate.

(F) The expression of miR-342-5p and miR-342-3p in neurospheres of the first-generation (1°) and third-generation (3°) was determined by qRT-PCR. RNA samples were extracted from four pairs of passaged neurospheres.

Bars, means  $\pm$  SD. \* $p < 0.05$ , \*\* $p < 0.01$ , \*\*\* $p < 0.001$ , ns, not significant.

consistent with a negative regulation of miR-342-5p expression by Notch signaling (Figure 1D). Next, we examined the expression of miR-342-5p by in situ hybridization on E14.5 brain sections. The results showed that from VZ to SVZ, the expression of miR-342-5p gradually elevated either in the developing cortex or GE, indicating that its expression was upregulated along with NSC differentiation (Figure 1E). miR-342-5p also has a weak expression in the intermediate zone and a moderate expression in the cortical plate (Figure 1E). To validate the elevated expression of miR-342-5p in INPs compared with NSCs, we also examined the expression of miR-342-5p and miR-342-3p in neurospheres of the first-generation and third-generation spheres, because more NSCs were enriched in the 3°

spheres as the passages through different generations had excluded the progenitor cells with less self-renewal ability. We found that their expression apparently decreased in the third-generation neurospheres (Figure 1F).

### Notch Signaling Regulated the Promoter of *Evl* that Harbors miR-342

The *Evl* promoter region (Grady et al., 2008) harbors an RBP-J-binding site, three N boxes (–4,519 to –4,514, –3,942 to –3,937, –430 to –435) and five E boxes (Iso et al., 2003) (Figure 2A). We cloned different fragments of the *Evl* promoter region, and constructed reporter genes named *Evl*-RepS (–1,227 to +100), *Evl*-RepM (–3,449 to +100), and *Evl*-RepL (–5,000 to +100) encompassing

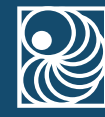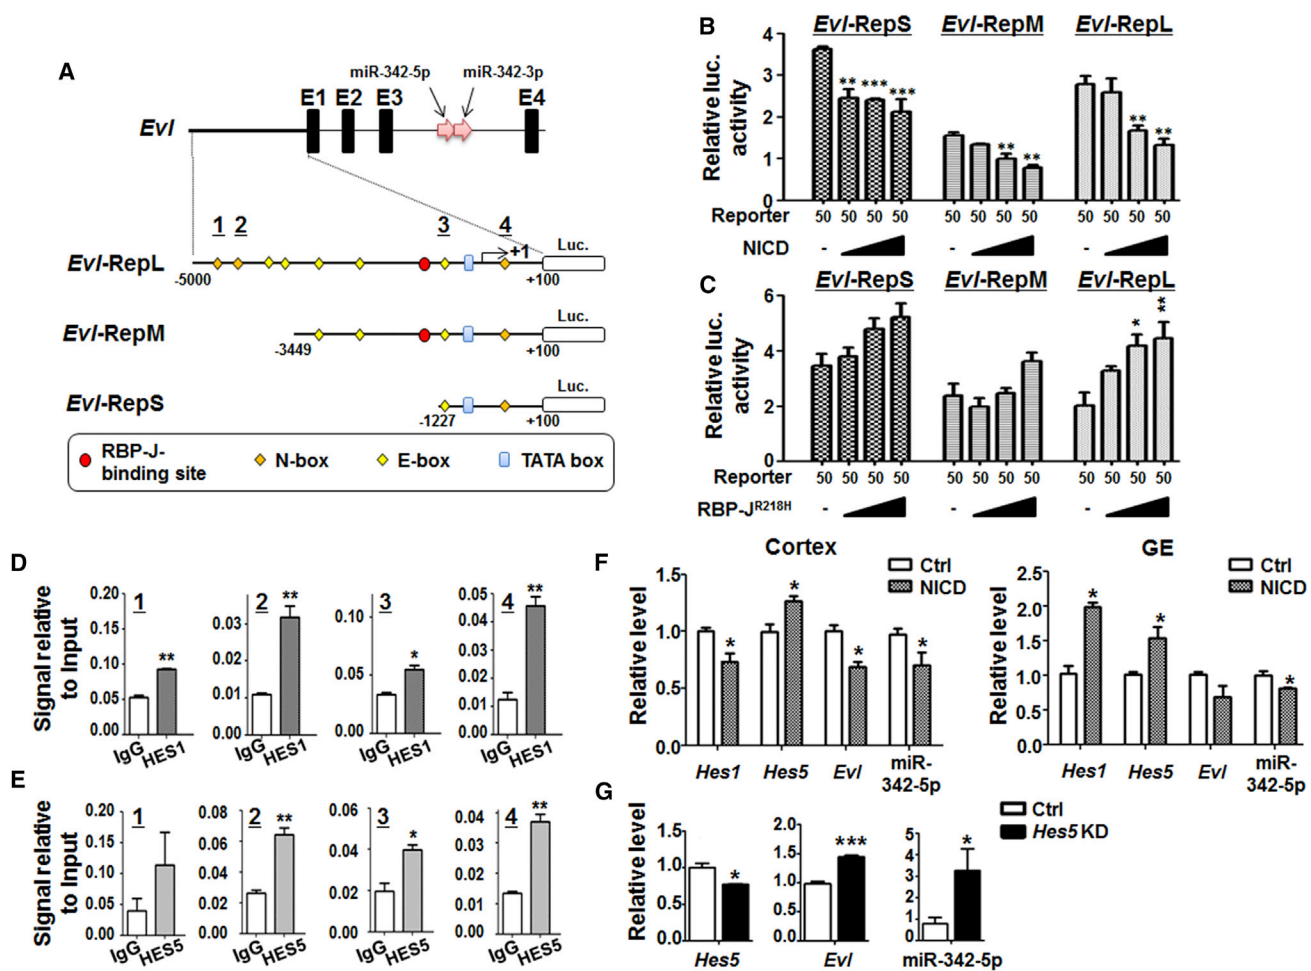

**Figure 2. Notch Signaling Regulated the *Evl* Promoter**

(A) Schematic illustration of the mouse *Evl* promoter, the reporter constructs, and the position of primers used in ChIP. Thick line, thin lines, and filled boxes represent 5' upstream sequence, introns, and exons, respectively. The miR-342-5p gene and miR-342-3p gene are represented by two pink arrows. The putative RBP-J-binding site, N boxes, E boxes, and a TATA box are indicated by a red dot, orange quadrangles, yellow quadrangles, and a blue box, respectively. Different promoter fragments were cloned into the pGL3-basic vector to construct the reporters including *Evl*-RepL (−5,000 → +100 bp), *Evl*-RepM (−3449 → +100 bp), and *Evl*-RepS (−1,227 → +100 bp). (B and C) Reporter assays. NIH3T3 cells were transfected with different reporters in combination with increasing amounts of pEFBOS-NICD (B) or pCMV-RBP-J<sup>R218H</sup> (C). A *Renilla* luciferase (*luc*) expression vector was co-transfected as an internal control. Cell lysates were prepared 48 hr after the transfection, and luciferase activity was determined. Reporter assays were done by four independent transfections, and three wells of 96-well plates were prepared as replicate samples in each group.

(D and E) ChIP assays. Crosslinked chromatin was prepared from cultured primary neurospheres (neurospheres derived from three different wild-type embryos), and immunoprecipitated with immunoglobulin G (IgG) and anti-HES1 (D) or anti-HES5 (E) antibody. After washing, the co-precipitated DNA was extracted and amplified by PCR primers targeting three different N boxes and an E box; numbers underlined in (A).

(F) Neurospheres cultured from E15.5 cortex and GE of *NesCre-Rosa-Stop*<sup>f/+</sup>-NIC (NICD) and *Rosa-Stop*<sup>f/+</sup>-NIC embryos (Ctrl) were harvested and total RNAs were extracted. The expressions of *Hes1*, *Hes5*, *Evl*, and miR-342-5p were determined by qRT-PCR. Neurospheres were derived from three different pairs of littermates.

(G) Neurospheres were transfected with siHes5 and control oligonucleotide (three independent transfections performed), and the expressions of *Hes5*, *Evl*, and miR-342-5p were analyzed by qRT-PCR.

Bars, means ± SD. \*p < 0.05, \*\*p < 0.01, \*\*\*p < 0.001.

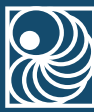

different transcription recognition sites. NIH3T3 cells were transfected with different reporters and increasing amounts of pEFBOS-NICD, with a *Renilla* luciferase vector as an internal control. The result showed that, 48 hr after the transfection, overexpression of NICD resulted in reduced luciferase activity in cells transfected with each of the three reporters (Figure 2B). On the contrary, transfection of NIH3T3 cells with pCMV-RBP-J<sup>R218H</sup> (R218H), a dominant-negative form of RBP-J, led to increased luciferase expression (Figure 2C). Similar results were obtained when HEK293 or PC12 cells were employed in the reporter assays (data not shown). These results suggested that Notch signaling might negatively regulate the expression of *Evl*/miR-342-5p through the *Evl* promoter.

The repressing of the *Evl* promoter appeared not dependent on the RBP-J-binding site, suggesting that Notch signaling might regulate the *Evl* promoter through N- and E-boxes. Therefore we performed chromatin immunoprecipitation (ChIP) assays with the anti-HES1 and anti-HES5 antibodies using primary neurospheres cultured from E15.5 telencephalon. The result showed that, compared with the control (ChIP with immunoglobulin G), all three N boxes and the E box examined were enriched in the anti-HES1-precipitated chromatins (Figure 2D). It was the same for the anti-HES5-precipitated chromatins, except for the first N box (Figure 2E). These results suggested that Notch signaling might regulate the *Evl* promoter through HES1 and HES5.

To further verify the regulation of miR-342-5p and *Evl* expression by Notch signaling in NS/PCs, we took advantage of *NesCre* transgenic mice and *ROSA-Stop<sup>f</sup>-NICD* mice (Zhao et al., 2016) to obtain NS/PCs with activated Notch signaling by culturing neurospheres from the E15.5 cortex and GE. By qRT-PCR, we found that the expression of *Hes5* increased, whereas that of *Hes1* increased in the GE but decreased in the cortex (Figure 2F). In contrast to that of *Hes5*, the expression of *Evl* and miR-342-5p reduced (Figure 2F). These results showed that the activation of Notch signaling could inhibit the expression of miR-342-5p, which was consistent with the increased expression of miR-342-5p in our genetic or pharmaceutical Notch blockade models. We then transfected siHes5 or the scrambled control siRNA into cultured neurospheres, and found that the expressions of miR-342-5p and *Evl* were elevated with the knockdown of *Hes5* (Figure 2G). These results implied that Notch signaling might inhibit the expression of *Evl* and miR-342-5p through the transcription repressor HES5 in vivo.

### miR-342-5p Reduced the Formation of Neurospheres and NS/PC Colonies In Vitro

In order to reveal the role of miR-342-5p in NSCs, we transfected cultured NS/PCs with synthetic miR-342-5p mimics.

Nearly 100% of the neurospheres could be transfected with Cy3-labeled scrambled control oligonucleotides by liposome-mediated transfection (Figure S2A). Therefore, we first cultured mouse primary NS/PCs under adherent conditions for 12 hr and transfected them with miR-342-5p mimics or control oligonucleotides. The cells were then detached and replated, and cultured under the neurosphere conditions for 7 days to observe the formation of neurospheres (Figure S2B). The result showed that upregulation of miR-342-5p led to reduced neurosphere formation (Figures 3A and S4A).

When the transfected adherent NS/PCs were replated onto poly-L-lysine-coated plates at a very low clonal density (Figure S2C), individual NS/PCs could form spatially isolated colonies (Molofsky et al., 2003). The transfection of miR-342-5p reduced the total number of colonies ( $86 \pm 7.21$  colonies in control versus  $35 \pm 9.17$  colonies in the miR-342-5p group) (Figure 3B). The average cell number in each colony also decreased dramatically after transfection of miR-342-5p ( $54.57 \pm 10.84$  versus  $19.33 \pm 2.96$ ) (Figure 3C). These results suggested that upregulation of miR-342-5p could inhibit the formation of NS/PC colonies in both suspension and under the adherent condition.

### miR-342-5p Inhibited the Proliferation of NS/PCs

The reduced neurospheres and colony formation might be caused by enhanced apoptosis and decreased proliferation of NS/PCs, we then examined their apoptosis and proliferation. We performed TUNEL staining to detect apoptosis in NS/PCs transfected with miR-342-5p. The result showed that under the clonal-density adherent conditions, NS/PCs transfected with miR-342-5p mimics exhibited a slight increase in the percentage of TUNEL-positive cells compared with the control (Figures S4B and S4C). Moreover, immunofluorescence staining of activated caspase-3 (aCASP3) in cells cultured under the normal-density adherent conditions also indicated that overexpression of miR-342-5p increased aCASP3-positive cells (Figures S4D and S4E). These results suggested that miR-342-5p might induce apoptosis in NS/PCs. However, we also found that NESTIN-positive cells hardly showed aCASP3-positive signals (Figure S4D). Therefore, we analyzed the proliferation and differentiation phenotypes within the NESTIN-positive NS/PCs to avoid the influence of cells that underwent subsequent apoptosis.

We then examined the proliferation of NS/PCs in the clonal-density adherent culture model using bromodeoxyuridine (BrdU) incorporation. NS/PCs were transfected with miR-342-5p mimics and the control as above, and cultured under the clonal-density adherent conditions for 7 days (Figure S2D). BrdU was added into the medium 18 hr before the harvest of the cells. Immunofluorescence staining with anti-BrdU antibody showed that transfection

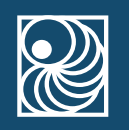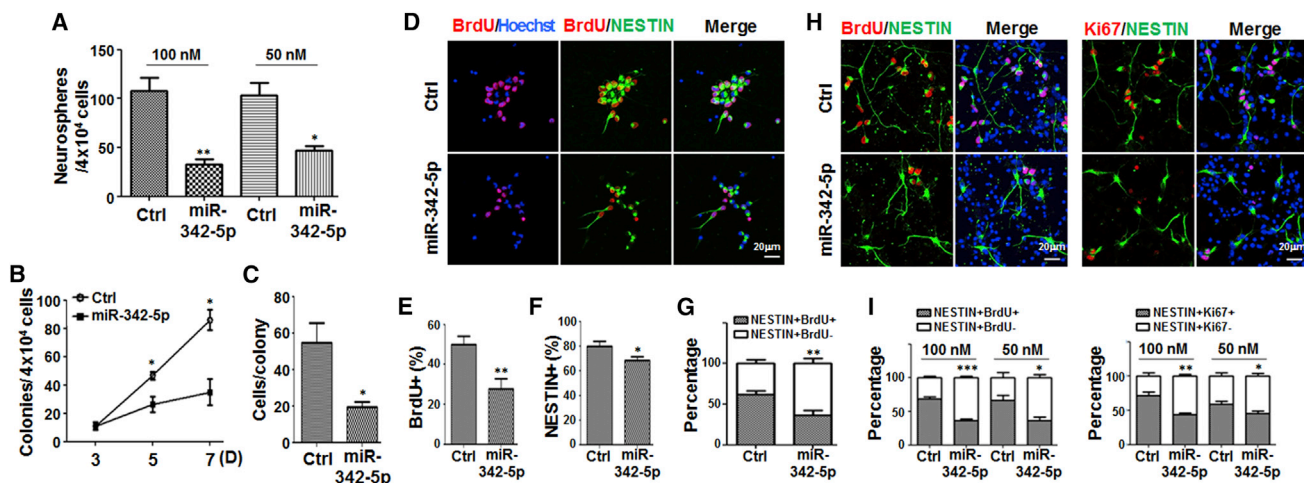

**Figure 3. Overexpression of miR-342-5p Repressed the Formation of Both Suspended Neurospheres and Adherent Colonies, and Repressed the Proliferation of NS/PCs**

(A) Single-cell suspensions were prepared from the GE of E15.5 embryos and cultured on poly-L-lysine (PLL)-coated dishes in DF12 medium supplemented with  $N^2$ , 20 ng/mL bFGF, and 20 ng/mL EGF. After 12 hr, NS/PCs were transfected with 50 or 100 nM miR-342-5p mimics or control oligonucleotides (Ctrl). Cells were detached 4 hr later and cultured under neurosphere conditions for 7 days. The cultures were photographed and the number of neurospheres was determined under a microscope. The transfections were done five times independently. (B and C) NS/PCs derived from normal embryos were transfected with 100 nM miR-342-5p mimics or control as in (A) (five independent transfections performed). Cells were then replated at clonal density on PLL-coated dishes for 7 days. The number of colonies (B) and cell number per colony (C) were determined.

(D–I) NS/PCs were transfected with miR-342-5p mimics and the control, and were cultured adherently at clonal density for 7 days (D–G) (five independent transfections performed) or at normal density for 48 hr (H and I) (five independent transfections performed). BrdU was added into the medium 18 hr before the end of the experiment. Cells were fixed and stained with anti-BrdU and anti-NESTIN antibodies by immunofluorescence staining (D) or with anti-BrdU, anti-NESTIN, and anti-Ki67 antibodies (H). Nuclei were counterstained with a Hoechst stain. The percentages of BrdU+ (E), NESTIN+ (F), and NESTIN+ BrdU+ (G) cells within one colony were determined (50 colonies counted in each group). The percentages of NESTIN+ BrdU+ cells and NESTIN+ Ki67+ cells within one field were determined (I) (ten fields counted in each group).

Bars, means  $\pm$  SD. \* $p < 0.05$ , \*\* $p < 0.01$ , \*\*\* $p < 0.001$ .

of the miR-342-5p mimics reduced the incorporation of BrdU within each colony ( $49.91\% \pm 4.15\%$  in the control group versus  $27.7\% \pm 5.26\%$  in the miR-342-5p-transfected group) (Figures 3D and 3E). The percentage of NESTIN-positive cells slightly reduced (Figures 3D and 3F), however, the percentage of BrdU-positive cells in NESTIN-positive fraction decreased dramatically in the miR-342-5p-transfected group (Figure 3G) ( $63.46\% \pm 6.01\%$  in the control group versus  $37.77\% \pm 4.60\%$  in the miR-342-5p-transfected group). Similar result was obtained when transfected NS/PCs were cultured under the normal-density adherent condition (Figures 3H, 3I, and S2E). These results suggested that overexpression of miR-342-5p inhibited NS/PC proliferation.

#### miR-342-5p Promoted the Differentiation of NSCs into INPs In Vitro

RBP-J-dependent Notch signaling has been implicated in the differentiation of NSCs into INPs (Mizutani et al., 2007). To determine NSCs and INPs in cultured NS/PCs,

we employed the clonal-density adherent culture system which allows distinguishing NSC colonies from INP colonies retrospectively after they were induced to differentiate (Figure S2F). Colonies differentiating into a single type of progeny, either neurons or astrocytes, were INP colonies, while colonies giving both neurons and astrocytes were NSC colonies. The results showed that, compared with the control, NS/PCs transfected with miR-342-5p contained fewer bipotential colonies (GFAP+ TUJ1+) ( $70.23\% \pm 5.57\%$  in control versus  $39.32\% \pm 4.99\%$  in miR-342-5p transfected cells). Meanwhile, mono-potential colonies, either astrocytes (GFAP+) or neurons (TUJ1+), increased remarkably after transfection with miR-342-5p (Figure 4A). Furthermore, cortex NS/PCs were cultured and transfected with miR-342-5p mimics or the control, followed by the normal-density adherent culture in differentiation medium for 2 days. Immunofluorescence staining with anti-PAX6 and TBR2, which were markers for cortical NSCs and INPs, respectively (Englund et al., 2005), showed that transfection of miR-342-5p mimics led to reduced numbers

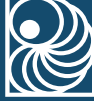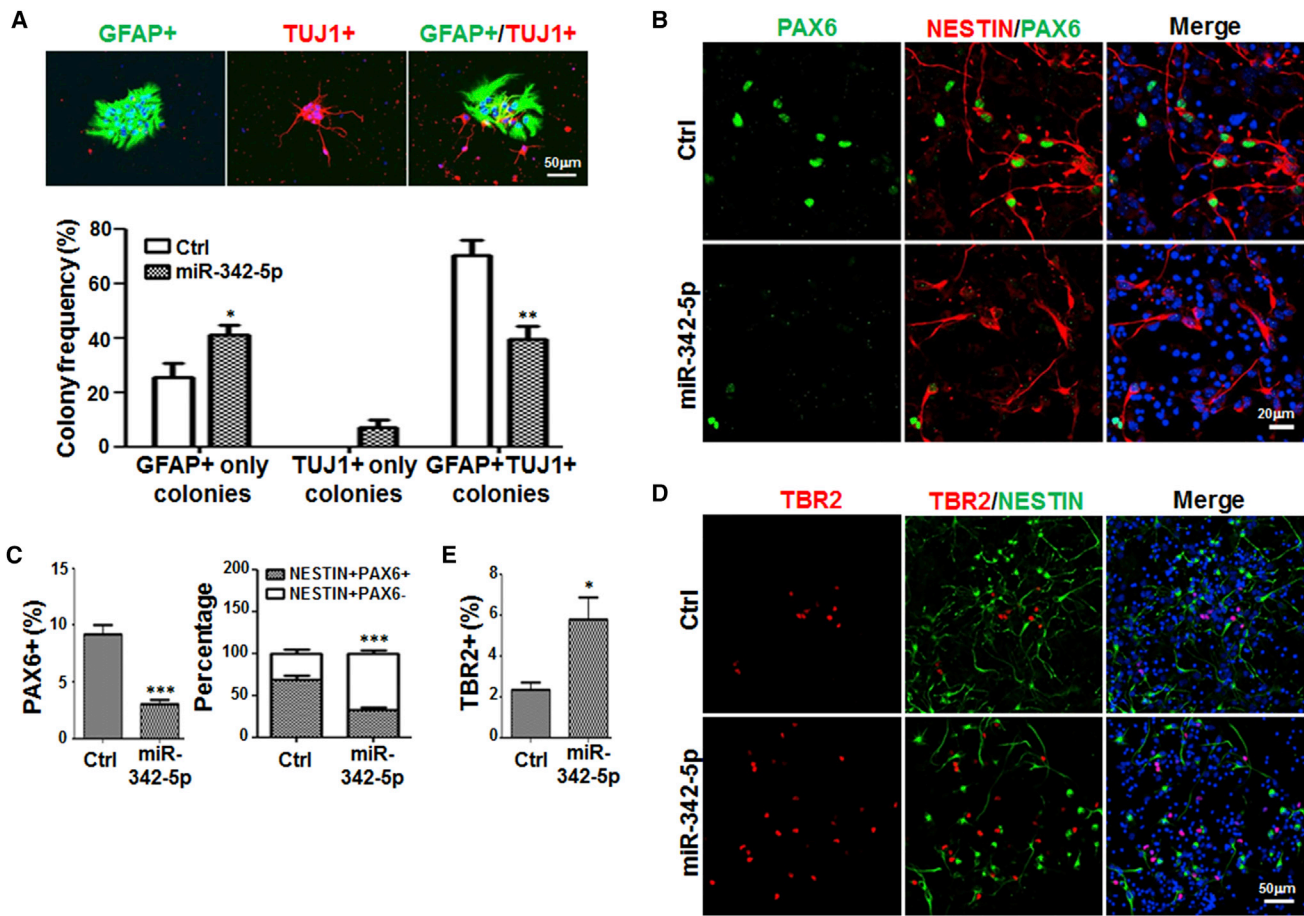

**Figure 4. miR-342-5p Promoted the Differentiation of NS/PCs into INPs In Vitro**

(A) NS/PCs were transfected with miR-342-5p mimics or control (five independent transfections performed), and cultured under the adherent condition to proliferate at clonal density for 7 days. The newly formed colonies were further induced to differentiate for 48 hr with low mitogens (DF12 containing  $1/2 \times N^2$ , 5 ng/mL bFGF and 5 ng/mL EGF) supplemented with 5% FBS. Cells were then fixed and stained with anti-GFAP and anti-TUJ1. The frequencies of GFAP+, TUJ1+, and GFAP+ TUJ1+ colonies were compared (50 colonies counted in each group).

(B and C) Adherently cultured NS/PCs were stained with anti-PAX6 and anti-NESTIN (B), and percentages of PAX6+ cells in total cells or NESTIN+ cells were determined (C) (eight fields counted in each group).

(D and E) NS/PCs were stained with anti-TBR2 and anti-NESTIN (D), and percentage of TBR2+ cells were determined (E) (eight fields counted in each group).

Bars, means  $\pm$  SD. \* $p < 0.05$ , \*\* $p < 0.01$ , \*\*\* $p < 0.001$ .

of both total PAX6-positive cells and NESTIN-positive PAX6-positive cells (Figures 4B and 4C). In contrast, TBR2-positive cells increased in the miR-342-5p-transfected NS/PCs (Figures 4D and 4E). These results suggested that overexpression of miR-342-5p enhanced the differentiation of NSCs into INPs.

#### miR-342-5p Promoted Precocious Differentiation of NSCs In Vivo

In order to verify the role of miR-342-5p in vivo, we performed in utero embryonic electroporation of E15.5 mice embryo with the miR-342-5p expression vector

(pcDNA6.2-GW/EmGFP-miR-342-5p), which could also express EGFP. The embryos were collected on E18.5, cryo-sectioned, and stained with anti-PAX6. The result showed that in the control group (electroporated with pcDNA6.2-GW/EGFP-negative control), 71.94%  $\pm$  3.329% of EGFP-positive cells were PAX6-positive (Figure 5A, arrows). But in mice electroporated with the miR-342-5p-expressing plasmid, the number of EGFP- and PAX6-double-positive cells was reduced significantly (58.98%  $\pm$  5.295%) (Figures 5A and 5B), suggesting a decrease of NSCs. Moreover, in the miR-342-5p group, it appeared that more EGFP-positive cells migrated out of the germinal zone (bin 1,  $p = 0.0052$ )

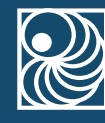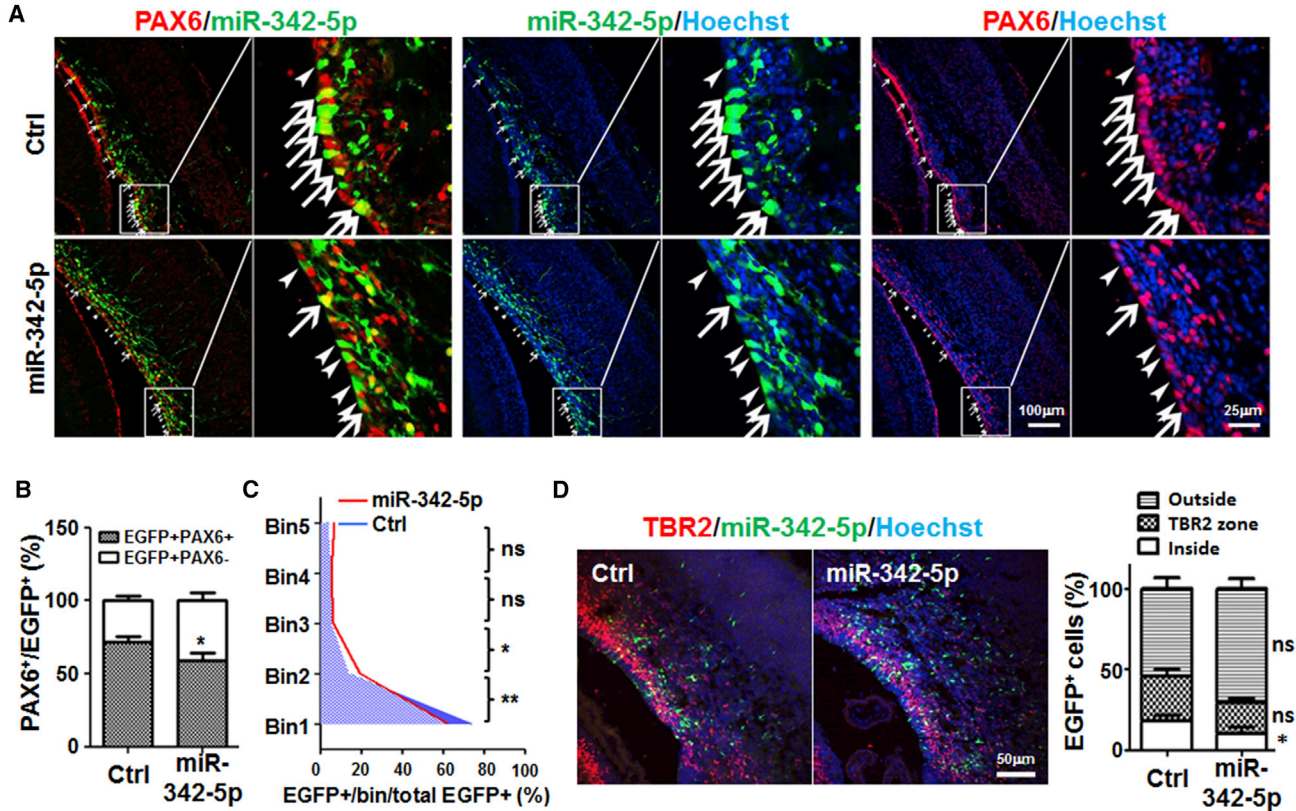

**Figure 5. miR-342-5p Promoted Precocious Differentiation of NSCs In Vivo**

(A) The forebrain areas of E15.5 mouse embryos were electroporated in utero with pcDNA6.2-GW/EmGFP-miR-342-5p (miR-342-5p) that could express miR-342-5p and EGFP, or with pcDNA6.2-GW/EGFP-negative control (Ctrl) that expressed only EGFP as a control. At E18.5, the mice were perfused and brains were fixed, cryosectioned, and stained with anti-PAX6 using immunofluorescence. Nuclei were counterstained with a Hoechst stain. Arrows and arrowheads represent EGFP- and PAX6-double-positive cells and EGFP-single-positive cells, respectively. Five pairs of littermates successfully electroporated with miR-342-5p and Ctrl separately were obtained.

(B) The percentage of PAX6-positive cells in EGFP-positive cells was compared (12 fields counted in each group).

(C) The EGFP-positive cells in each bin of five bins of the transfected cortical region were counted, and the percentage of EGFP-positive cells of each bin in total EGFP-positive cells was determined. Asterisks represent statistical analysis of the difference between the miR-342-5p-transfected and the control groups in the bin 1 and bin 2 areas (ten fields counted in each group).

(D) Samples in (A) were stained with anti-TBR2. The EGFP-positive cells were compared in the SVZ (TBR2+ zone), VZ (inside SVZ), and cortex (outside the SVZ) regions (ten fields counted in each group).

Bars, means  $\pm$  SD. \* $p < 0.05$ , \*\* $p < 0.01$ , ns, not significant.

toward the basal side (pial surface) of the cortex (bins 2–5,  $p = 0.0333$  in bin 2), consistent with precocious differentiation of NSCs (Figures 5A and 5C). Moreover, the samples were stained with anti-TBR2 antibody by using immunofluorescence. The result showed that although the percentage of TBR2-positive cells within the total EGFP-positive cells had no change between the miR-342-5p and the control groups, more miR-342-5p-transfected cells migrated out of the VZ zone which was outlined within TBR2-positive cell bands (Figure 5D). No differences in proliferation or apoptosis were detected between the two groups (data not shown). In summary, our in vivo electroporation data

suggested that overexpression of miR-342-5p could promote precocious differentiation of NSCs.

#### miR-342-5p Targeted GFAP and Regulated Astrocyte Differentiation

Bioinformatic searching of miR-342-5p-targeted genes suggested that miR-342-5p might regulate GFAP expression through its 3' UTR, which harbors two miR-342-5p recognition sites (Figure 6A). Indeed, western blotting of NS/PCs transfected with miR-342-5p mimics indicated that GFAP expression was reduced dramatically (Figure 6B). We then cloned the two fragments of 3' UTR of mouse *Gfap* cDNA



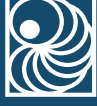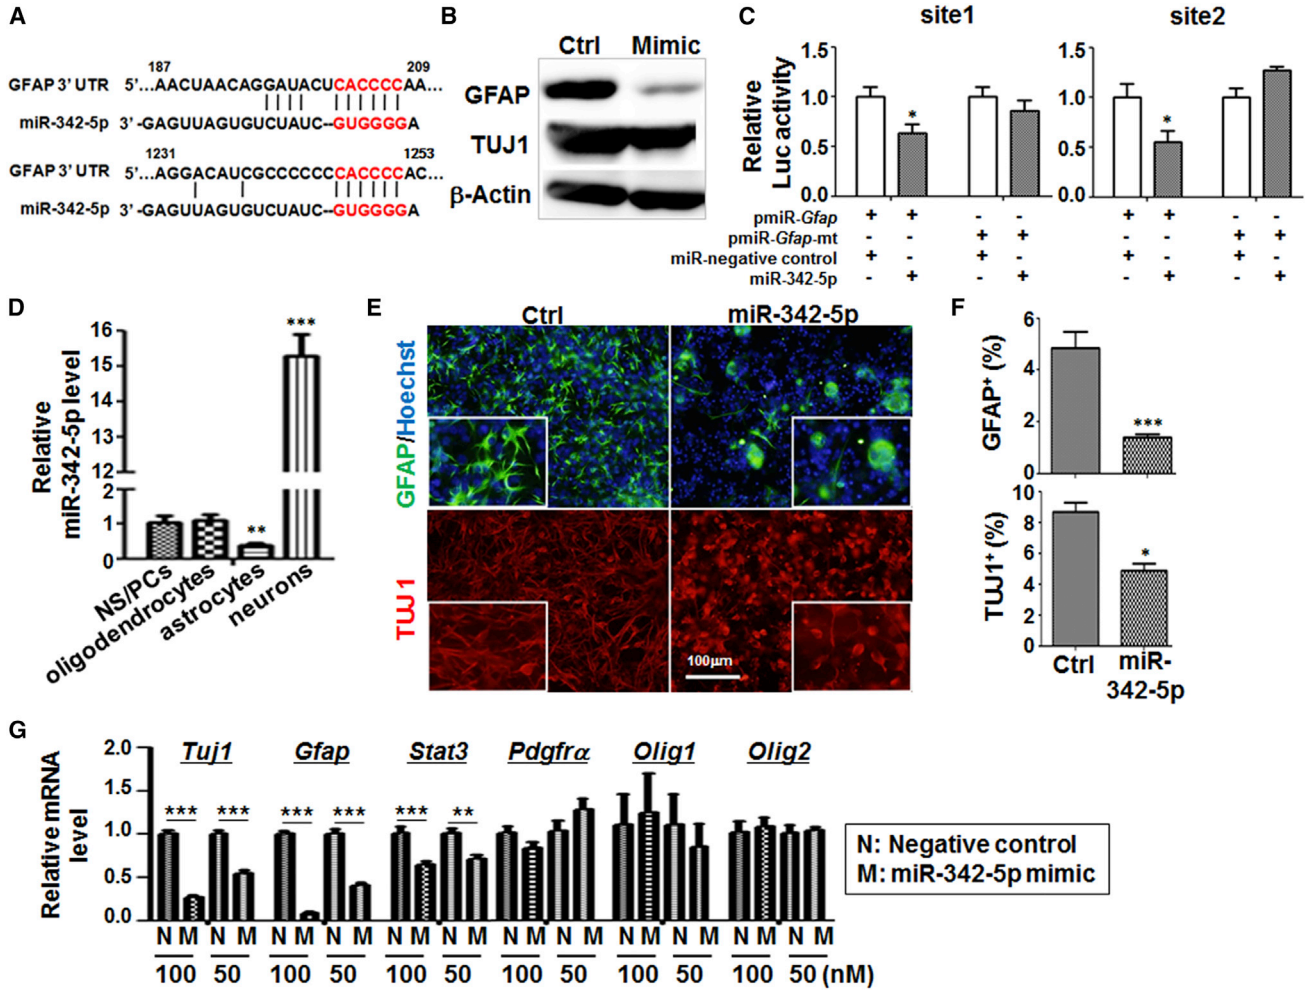

**Figure 6. miR-342-5p Targeted GFAP and Regulated Astrocyte Differentiation**

(A) The sequence of the 3' UTR of *Gfap* was aligned with the seed sequence of miR-342-5p. The recognized sequences (nucleotides 202–207 and 1,246–1,251) are marked in red.

(B) Adherently cultured NS/PCs were transfected with miR-342-5p mimics or the control (five independent transfections performed), and 4 hr later 5% FBS medium was applied to induce the differentiation for another 48 hr. Cells were collected and cell lysates were analyzed by western blot using anti-GFAP, anti-TUJ1, and anti-β-actin.

(C) Reporter assays. Cos7 cells were transfected with different reporter constructs, pcDNA6.2-GW/EmGFP-miR-342-5p and pcDNA6.2-GW/EmGFP-miR-negative control, and pRL-TK-expressing *Renilla* luciferase as an internal control. Cells were lysed 48 hr after the transfection, and luciferase activities in the cell lysates were determined. Reporter assays were done by four independent transfections, and three wells of a 96-well-plate were prepared as replicate samples in each group.

(D) Primary neurospheres (NS/PCs), oligodendrocytes, astrocytes, and neurons were isolated from rats (each type of cells derived from three different rat samples). Total RNA was extracted from cells and the expression of miR-342-5p was determined by qRT-PCR, with U6 RNA as an endogenous reference.

(E and F) NS/PCs were transfected with miR-342-5p or the control (five independent transfections performed), and cells were induced to differentiate by 5% FBS for 48 hr, and then fixed and stained with anti-GFAP and anti-TUJ1. Nuclei were counterstained with a Hoechst stain. The percentages of GFAP+ cells and TUJ1+ cells were compared (eight fields counted in each group).

(G) After differentiation, cells were collected, and the expressions of genes related with progeny cells were analyzed by qRT-PCR. Transfections of miR-342-5p mimic and the negative control were performed with 50 and 100 nM dosages (three independent transfections performed).

Bars, means ± SD. \*p < 0.05, \*\*p < 0.01, \*\*\*p < 0.001, ns, not significant.



containing the two miR-342-5p recognition sites, respectively, and constructed reporter plasmids with the wild-type or mutant miR-342-5p seed sequences using the pMIR-REPORT luciferase vector. Luciferase assays showed that miR-342-5p could repress luciferase expression by targeting either pmiR-GFAP-site1 or pmiR-GFAP-site2, and the mutation of site 1 or site 2 abolished the repression by miR-342-5p (Figure 6C). This result suggested that miR-342-5p could directly target GFAP and inhibit its expression, through binding site 1 and site 2 in the 3' UTR of *Gfap* mRNA.

We then examined the role of miR-342-5p in the differentiation of astrocytes, in which *Gfap* is specifically expressed. qRT-PCR indicated that, compared with NS/PCs, the expression of miR-342-5p was downregulated in astrocytes but strongly upregulated in neurons (Figure 6D). We then transfected miR-342-5p mimics into adherent NS/PCs, and induced the differentiation of the transfected NS/PCs by culturing them in the presence of serum for 48 hr (Figure S2G). Differentiated cells were fixed and stained with different antibodies. The result showed that GFAP-positive astrocytes reduced significantly in miR-342-5p-transfected cells (4.8% in the control versus 1.7% in miR-342-5p-transfected cells) (Figures 6E and 6F). The morphology of astrocytes also apparently changed with retracted processes and round cell bodies (Figure 6E). The number of TUJ1-positive neurons also reduced but to a less extent (Figure 6F, lower). These results suggested that miR-342-5p repressed the differentiation of astrocytes, likely through directly targeting GFAP.

Further analyses on mRNA expression of NS/PC differentiation was performed by qRT-PCR (Figure 6G). The results showed that the expression of astrocyte-related genes *Gfap* and *Stat3* was decreased after overexpression of miR-342-5p in a dose-dependent manner. This was the same with the neuronal marker *Tuj1*, but the oligodendrocyte-related genes *Pdgfra*, *Olig1*, and *Olig2*, showed no obvious changes. These results were in accordance with the immunocytofluorescence results (Figures 6E and 6F), and altogether suggested that miR-342-5p repressed the commitment of NS/PCs into astrocytes.

### Inhibition of miR-342-5p Could Rescue Part of the Phenotypes of Notch Blockade in NS/PCs

To further validate the functions of miR-342-5p by loss of function analyses, we transfected a miR-342-5p inhibitor into GSI-treated NS/PCs and analyzed the proliferation and differentiation of NS/PCs. The transfected NS/PCs cultured with DMSO showed increased NESTIN<sup>+</sup> NSCs (Figures 7A and 7B), and when the Notch signal was inhibited by GSI, NS/PCs transfected with miR-342-5p inhibitor showed increased NESTIN<sup>+</sup> NSCs and sphere formation compared with those of the control (Figures 7A–7C).

These results indicated that miR-342-5p acts as a downstream effector to promote NSC differentiation upon Notch blockade.

We then accessed the relationship between Notch signaling and miR-342-5p in astrocyte differentiation by blocking Notch signaling with GSI and transfecting miR-342-5p mimics or inhibitors. As shown in Figures 7D and 7E, GSI treatment reduced GFAP-positive astrocytes. When cells were transfected with miR-342-5p mimics and treated with GSI simultaneously, GFAP-positive cells were reduced further, suggesting that GSI and miR-342-5p repressed astrocyte differentiation additively. The miR-342-5p inhibitor did not promote astrocyte differentiation or rescue the GSI-induced astrocyte repression, suggesting that the miR-342-5p was necessary but not sufficient for astrocyte differentiation. It was likely that there were additional downstream targets of Notch signaling affecting astrocyte differentiation besides miR-342-5p, therefore inhibition of miR-342-5p alone failed in rescuing astrocyte differentiation.

## DISCUSSION

Notch signaling has been reported to play multiple roles during the CNS development. In progenitor cells, Notch signaling inhibits the differentiation of NSCs into INPs (Gao et al., 2009; Mizutani et al., 2007; Pierfelice et al., 2011). There are at least three types of neural progenitor cells in embryonic neocortex, including NSCs in the VZ, INPs in the VZ, and INPs in the SVZ. While a majority of INPs are in the SVZ, a fraction of INPs coexists with NSCs in the VZ. The Notch pathway is differentially used by these different types of progenitor cells. NSCs in the VZ, which have self-renewal and multipotent differentiation characteristics, exhibit RBP-J dependence. INPs in the VZ, in contrast, display attenuated RBP-J activity and are predominantly neurogenic. In addition, INPs in the SVZ signal to adjacent cells by expressing Notch ligands. A major unanswered question about the role of Notch signaling in NSCs-INPs is the downstream molecules controlling NSC differentiation. In this study, we have identified miR-342-5p as one of the downstream miRNAs of Notch signaling during NSC differentiation based on the following findings.

The expression of miR-342-5p is inversely correlated with Notch signaling in the tissues and cells examined. The in situ hybridization results of miR-342-5p showed that its expression gradually elevated from the VZ to the SVZ, which was complementary to the pattern of attenuated RBP-J-dependent Notch signaling from the VZ to the SVZ (Mizutani et al., 2007). In addition, modulations of Notch signaling led to changes in the expression of miR-342-5p. Blocking Notch signaling genetically or pharmaceutically

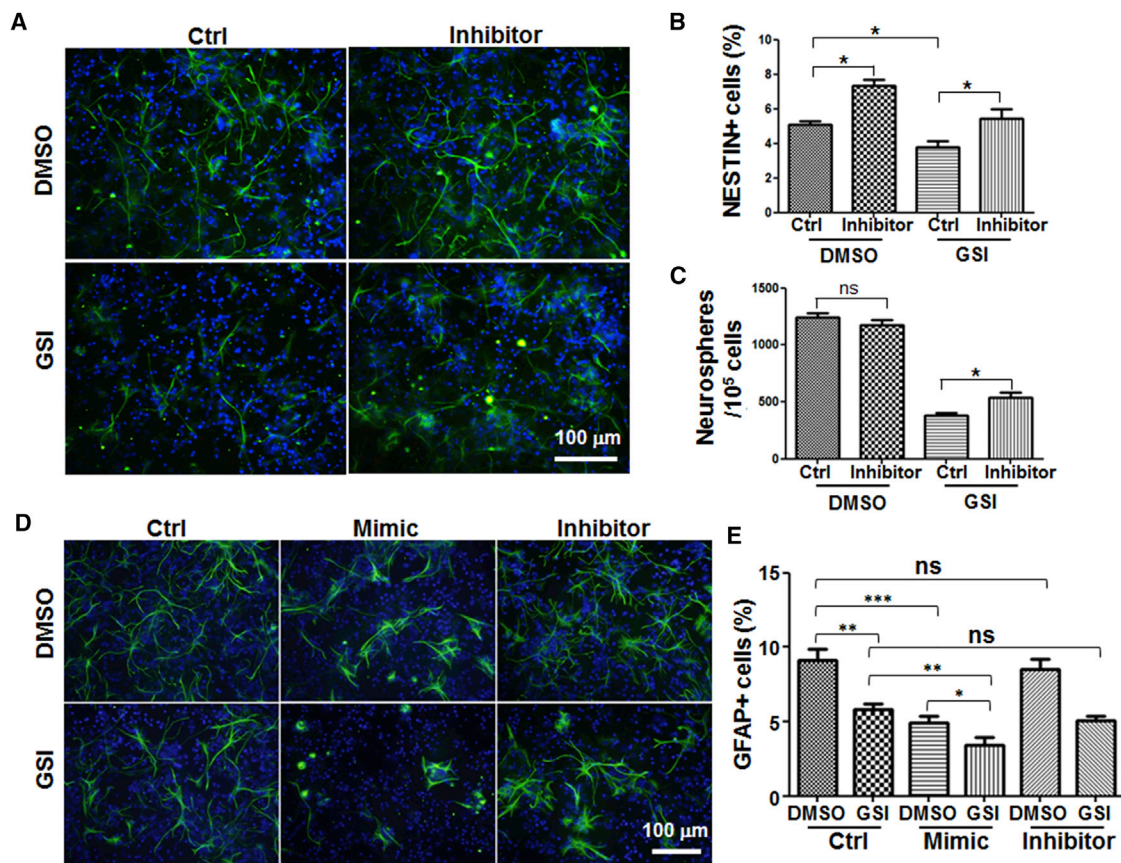

**Figure 7. Inhibition of miR-342-5p Could Rescue Part of the Phenotypes Caused by Notch Blockade**

(A and B) Adherent NS/PCs were treated with GSI or DMSO, and miR-342-5p inhibitor or control were transfected into these cells (four independent transfections performed). After 48 hr, NS/PCs were fixed and stained with anti-NESTIN antibody (A). The percentage of NESTIN+ cells within cells of one field was calculated (B) (eight fields counted in each group).

(C) NS/PCs treated as those in (A) were resuspended to form neurospheres. After 7 days, neurospheres were counted and compared. Four independent transfections were performed, and three wells of a 12-well-plate were counted as replicate samples in each group.

(D and E) NS/PCs treated as those in (A) were induced to differentiate for another 48 hr. Cells were then collected and stained with anti-GFAP antibody (D). The percentage of GFAP+ cells within cells of one field were analyzed (E) (eight fields counted in each group).

Bars, means  $\pm$  SD. \* $p < 0.05$ , \*\* $p < 0.01$ , \*\*\* $p < 0.001$ , ns, not significant.

in NS/PCs induced increased miR342-5p expression, whereas the activation of Notch signaling by NSC-specific NICD overexpression led to decreased miR342-5p expression. Since INPs increased in Notch blockade spheres (Gao et al., 2009), and miR-342-5p expression was upregulated in INPs compared with NSCs, it was difficult to judge whether the increase of miR-342-5p expression in *Rbp-j* KO spheres was only the result of INP enrichment or that miR-342-5p was directly regulated by Notch signaling, which then regulated the differentiation of NS/PCs in turn. To clarify this, we tested the expression profiles of miR-342-5p and INP marker *T $\alpha$ 1* in neurospheres treated with GSI for different periods of time, and found that miR-342-5p was upregulated prior to the increase of *T $\alpha$ 1*, indicating that the increase of miR-342-5p expression after

Notch blockade was not only a consequence of INP enrichment. Therefore, Notch signaling might directly regulate miR-342-5p expression. Although the intronic miRNA expression often occurs independent of host gene transcription, previous research has shown that the methylation of the *Evl* promoter region silenced the expression of both *Evl* and miR-342 together (Grady et al., 2008), indicating that the expression of miR-342 might be regulated by the same promoter of its host gene. Therefore, we investigated the regulation of the *Evl* promoter by Notch signaling. By using reporter assays, we have demonstrated that Notch signaling could directly regulate the transactivation of the promoter of *Evl* that harbors miR-342-5p and miR-342-3p genes. Because NICD repressed a truncated reporter in which the putative RBP-J-binding site was deleted, we



propose that Notch signaling likely modulates the *Evl* promoter through both RBP-J and HES proteins. Indeed, ChIP assays have shown that HES1 and HES5 could bind to multiple N boxes and at least one E box in the *Evl* promoter. However, further investigations on NSC-specifically NICD-overexpressed mice showed that *Hes5* expression was elevated, whereas *Hes1* expression showed different changes in the cortex and GE, and miR-342-5p and *Evl* expressions were decreased on Notch activation. In addition, the knockdown of *Hes5* by siRNA transfection into NS/PCs resulted in upregulated miR-342-5p and *Evl* expressions. Therefore, we thought that HES5 might directly regulate miR-342-5p expression through the *Evl* promoter instead of HES1 in vivo.

Functional analysis has shown that miR-342-5p promotes the differentiation of NSCs into INPs. Upregulation of miR-342-5p in cultured NS/PCs in vitro leads to reduced neurosphere formation and colony formation in the floating culture system and adherent culture system, respectively. Clonal analysis indicated that NSC clones were reduced while INP clones were increased. By using in utero electroporation in the embryo neocortex, we also found that upregulation of miR-342-5p reduced PAX6-positive NSCs and increased migrating neural cells that might undergo differentiating. These results suggest that enhanced expression of miR-342-5p could promote the differentiation of NSCs into INPs, and these phenotypes are consistent with that in Notch signal-blocked models (Gao et al., 2009; Hitoshi et al., 2002; Mizutani et al., 2007). Moreover, downregulation of miR-342-5p by its inhibitor transfection could partially rescue the decreased self-renewal and number of NSC neurospheres caused by the interrupted Notch signal. In summary, these results indicated that miR-342-5p acts as downstream effector to promote NSC differentiation into INPs on Notch blockade.

In addition to restricting NSCs differentiating into INPs, Notch signaling regulates differentiation of NS/PCs into astrocytes against neurons (Gaiano and Fishell, 2002). The expression of miR-342-5p is highest in neurons and lowest in astrocytes, suggesting a role of miR-342-5p in neuron and/or astrocyte differentiation. Indeed, our data have shown that miR-342-5p could inhibit the differentiation of NS/PCs into astrocytes. Furthermore, transfection of miR-342-5p in NS/PCs resulted in obvious morphological changes of differentiated astrocytes (and neurons to a lesser extent). On the other hand, neuronal differentiation was not enhanced at the expense of astrocyte commitment. Since miR-342-5p overexpression caused dramatically reduced numbers of astrocytes, which was supportive for neurons, the reduced number of neurons might be a successive defect of astrocyte deficiency. Further analyses should be done to clarify the role of miR-342-5p in neuronal differentiation in the future.

Although a number of target molecules of miR-342-5p have been predicted, with some of them verified by experiments (Wei et al., 2013), our results have identified GFAP as a target regulated by miR-342-5p. Since GFAP expression is fundamental for maintaining the identities of both RGCs and astrocytes, we could infer that as RBP-J-dependent Notch signaling is becoming attenuated in NSCs with their development, miR-342-5p increases and targets GFAP, which might result in NSCs losing their identity as radial glia and their potential change into astrocytes. In addition, we have found that the phosphorylated protein level of STAT3 was decreased after miR-342-5p overexpression in NS/PCs (Figure S5). STAT3 signaling has been shown to inhibit NSC transition to progenitors and promote astrocyte differentiation (Hong and Song, 2015). Therefore, the downregulation of STAT3 signaling might be one of the mechanisms of miR-342-5p functions on NS/PCs. Further analyses need to be done to investigate the direct or indirect regulation of STAT3 signaling by miR-342-5p during neurogenesis.

Besides the function on NS/PC differentiation, miR-342-5p overexpression inhibits proliferation and promotes apoptosis of NS/PCs. Further molecular analysis revealed that the total protein level of AKT was attenuated after miR-342-5p overexpression in NS/PCs, although the phosphorylated protein level of AKT was approximately stable (Figure S4F). These results indicate that the biological function of miR-342-5p on NS/PC proliferation and apoptosis might partially depend on targeting AKT, reminiscent of the same targeting mechanism of miR-342-5p in inflammatory macrophages during atherosclerosis (Wei et al., 2013). However, the accurate regulation relationship between miR-342-5p and AKT during neurogenesis, and their function on NS/PC proliferation and apoptosis, need further investigations.

In summary, our results have shown that Notch signaling could inhibit the expression of miR-342-5p. In NSCs where Notch signaling is activated, the level of miR-342-5p is low and NSCs maintain the potential to differentiate into GFAP-positive astrocytes. When some NSCs gradually differentiate into INPs, RBP-J expression decreases and miR-342-5p expression increases in these cells (Figure S6). These cells might lose the ability to differentiate into GFAP-positive astrocytes, and become neurogenic INPs. Therefore, miR-342-5p could perform as a downstream molecule of Notch signaling to regulate the proliferation and differentiation of NSCs.

## EXPERIMENTAL PROCEDURES

All animal experiments were approved by the Animal Experiment Administration Committee of Fourth Military Medical University. All animal manipulations were carried out in accordance with the



National Institute of Health guide for the care and use of Laboratory animals (NIH Publications, eighth edition), and all efforts were made to minimize the number of animals and their suffering.

## Mice

Normal C57BL/6 mice, *Rbp-j*-floxed (*Rbp-j<sup>f</sup>*) mice, *ROSA26-Stop*-floxed-NICD mice (*ROSA-Stop<sup>f</sup>*-NICD), and *Nestin-Cre* (*NesCre*) mice were as described (Gao et al., 2009; Han et al., 2002; Zhao et al., 2016). *NesCre* mice were mated with *Rbp-j<sup>f</sup>* mice to obtain *NesCre-Rbp-j<sup>f/f</sup>* mice as cKO mice and *NesCre-Rbp-j<sup>f/+</sup>* mice as controls. To achieve Notch activation in a wider range of NSCs, we utilized another *NesCre* mice stain (Jackson Laboratory 002859) to cross with *ROSA-Stop<sup>f</sup>*-NIC mice to obtain *NesCre-ROSA-Stop<sup>f/+</sup>*-NIC mice as conditional overexpressed mice and *ROSA-Stop<sup>f/+</sup>*-NIC mice as controls. All mice were maintained in a specific-pathogen-free facility. All animal experiments were approved by the Animal Experiment Administration Committee of the Fourth Military Medical University.

## SUPPLEMENTAL INFORMATION

Supplemental Information includes Supplemental Experimental Procedures and six figures and can be found with this article online at <http://dx.doi.org/10.1016/j.stemcr.2017.02.017>.

## AUTHOR CONTRIBUTIONS

H.H., M.H.Z., and G.J. designed and supervised the study. F.G. and Y.F.Z. cultured the primary NSCs and did the transfections. Z.P.Z. and L.A.F. performed analysis on transfected NSCs. X.L.C. produced all the mice used in this article. Y.Z.Z., C.J.G., and Y.Y.H. conducted the qRT-PCR analysis. X.C.Y. and Q.C.Y. constructed all the plasmids used in reporter assays and electroporation, F.G. and M.H.Z. performed the electroporation and in situ hybridization experiments. S.X.W., Y.Z.W., and X.H.Z. gave suggestions on the research and the manuscript. H.H., M.H.Z., and F.G. wrote the manuscript. All authors reviewed and approved the final manuscript.

## ACKNOWLEDGMENTS

This work was supported by grants from the National Natural Science Foundation (31471044, 31071291, 31101041, 31130019, and 91339115) and the Ministry of Science and Technology of China (2015AA020918). The study was performed in the Graduates Innovation Center of the Fourth Military Medical University.

Received: April 30, 2016

Revised: February 17, 2017

Accepted: February 20, 2017

Published: March 23, 2017

## REFERENCES

Bian, S., Xu, T.L., and Sun, T. (2013). Tuning the cell fate of neurons and glia by microRNAs. *Curr. Opin. Neurobiol.* 23, 928–934.  
Boucher, J.M., Peterson, S.M., Urs, S., Zhang, C., and Liaw, L. (2011). The miR-143/145 cluster is a novel transcriptional target

of Jagged-1/Notch signaling in vascular smooth muscle cells. *J. Biol. Chem.* 286, 28312–28321.

Englund, C., Fink, A., Lau, C., Pham, D., Daza, R.A., Bulfone, A., Kowalczyk, T., and Hevner, R.F. (2005). Pax6, Tbr2, and Tbr1 are expressed sequentially by radial glia, intermediate progenitor cells, and postmitotic neurons in developing neocortex. *J. Neurosci.* 25, 247–251.

Fineberg, S.K., Kosik, K.S., and Davidson, B.L. (2009). MicroRNAs potentiate neural development. *Neuron* 64, 303–309.

Franco, S.J., and Muller, U. (2013). Shaping our minds: stem and progenitor cell diversity in the mammalian neocortex. *Neuron* 77, 19–34.

Gage, F.H., and Temple, S. (2013). Neural stem cells: generating and regenerating the brain. *Neuron* 80, 588–601.

Gaiano, N., and Fishell, G. (2002). The role of notch in promoting glial and neural stem cell fates. *Annu. Rev. Neurosci.* 25, 471–490.

Gaiano, N., Nye, J.S., and Fishell, G. (2000). Radial glial identity is promoted by Notch1 signaling in the murine forebrain. *Neuron* 26, 395–404.

Gao, F., Zhang, Q., Zheng, M.H., Liu, H.L., Hu, Y.Y., Zhang, P., Zhang, Z.P., Qin, H.Y., Feng, L., Wang, L., et al. (2009). Transcription factor RBP-J-mediated signaling represses the differentiation of neural stem cells into intermediate neural progenitors. *Mol. Cell Neurosci.* 40, 442–450.

Grady, W.M., Parkin, R.K., Mitchell, P.S., Lee, J.H., Kim, Y.H., Tsuchiya, K.D., Washington, M.K., Paraskeva, C., Willson, J.K., Kaz, A.M., et al. (2008). Epigenetic silencing of the intronic microRNA hsa-miR-342 and its host gene *Evl* in colorectal cancer. *Oncogene* 27, 3880–3888.

Hamidi, H., Gustafson, D., Pellegrini, M., and Gasson, J. (2011). Identification of novel targets of CSL-dependent Notch signaling in hematopoiesis. *PLoS One* 6, e20022.

Han, H., Tanigaki, K., Yamamoto, N., Kuroda, K., Yoshimoto, M., Nakahata, T., Ikuta, K., and Honjo, T. (2002). Inducible gene knockout of transcription factor recombination signal binding protein-J reveals its essential role in T versus B lineage decision. *Int. Immunol.* 14, 637–645.

Hitoshi, S., Alexson, T., Tropepe, V., Donoviel, D., Elia, A.J., Nye, J.S., Conlon, R.A., Mak, T.W., Bernstein, A., and van der Kooy, D. (2002). Notch pathway molecules are essential for the maintenance, but not the generation, of mammalian neural stem cells. *Genes Dev.* 16, 846–858.

Hoeck, J.D., Jandke, A., Blake, S.M., Nye, E., Spencer-Dene, B., Brandner, S., and Behrens, A. (2010). Fbw7 controls neural stem cell differentiation and progenitor apoptosis via Notch and c-Jun. *Nat. Neurosci.* 13, 1365–1372.

Hong, S., and Song, M.R. (2015). Signal transducer and activator of transcription-3 maintains the stemness of radial glia at mid-neurogenesis. *J. Neurosci.* 35, 1011–1023.

Iso, T., Kedes, L., and Hamamori, Y. (2003). HES and HERP families: multiple effectors of the Notch signaling pathway. *J. Cell Physiol.* 194, 237–255.

Kohwi, M., and Doe, C.Q. (2013). Temporal fate specification and neural progenitor competence during development. *Nat. Rev. Neurosci.* 14, 823–838.



- Kriegstein, A., and Alvarez-Buylla, A. (2009). The glial nature of embryonic and adult neural stem cells. *Annu. Rev. Neurosci.* 32, 149–184.
- Kwiatkowski, A.V., Rubinson, D.A., Dent, E.W., Edward van Veen, J., Leslie, J.D., Zhang, J., Mebane, L.M., Philippar, U., Pinheiro, E.M., Burds, A.A., et al. (2007). Ena/VASP is required for neuritogenesis in the developing cortex. *Neuron* 56, 441–455.
- Louvi, A., and Artavanis-Tsakonas, S. (2006). Notch signalling in vertebrate neural development. *Nat. Rev. Neurosci.* 7, 93–102.
- Merkle, F.T., and Alvarez-Buylla, A. (2006). Neural stem cells in mammalian development. *Curr. Opin. Cell Biol.* 18, 704–709.
- Mizutani, K., Yoon, K., Dang, L., Tokunaga, A., and Gaiano, N. (2007). Differential Notch signalling distinguishes neural stem cells from intermediate progenitors. *Nature* 449, 351–355.
- Molofsky, A.V., Pardal, R., Iwashita, T., Park, I.K., Clarke, M.F., and Morrison, S.J. (2003). Bmi-1 dependence distinguishes neural stem cell self-renewal from progenitor proliferation. *Nature* 425, 962–967.
- Noctor, S.C., Martinez-Cerdeno, V., Ivic, L., and Kriegstein, A.R. (2004). Cortical neurons arise in symmetric and asymmetric division zones and migrate through specific phases. *Nat. Neurosci.* 7, 136–144.
- Pierfelice, T., Alberi, L., and Gaiano, N. (2011). Notch in the vertebrate nervous system: an old dog with new tricks. *Neuron* 69, 840–855.
- Redmond, L., Oh, S.R., Hicks, C., Weinmaster, G., and Ghosh, A. (2000). Nuclear Notch1 signaling and the regulation of dendritic development. *Nat. Neurosci.* 3, 30–40.
- Roese-Koerner, B., Stappert, L., Berger, T., Braun, N.C., Veltel, M., Jungverdorben, J., Evert, B.O., Peitz, M., Borghese, L., and Brustle, O. (2016). Reciprocal regulation between bifunctional miR-9/9( \*) and its transcriptional modulator Notch in human neural stem cell self-renewal and differentiation. *Stem Cell Rep.* 7, 207–219.
- Sestan, N., Artavanis-Tsakonas, S., and Rakic, P. (1999). Contact-dependent inhibition of cortical neurite growth mediated by notch signaling. *Science* 286, 741–746.
- Shi, Y., Zhao, X., Hsieh, J., Wichterle, H., Impey, S., Banerjee, S., Neveu, P., and Kosik, K.S. (2010). MicroRNA regulation of neural stem cells and neurogenesis. *J. Neurosci.* 30, 14931–14936.
- Tanigaki, K., Nogaki, F., Takahashi, J., Tashiro, K., Kurooka, H., and Honjo, T. (2001). Notch1 and Notch3 instructively restrict bFGF-responsive multipotent neural progenitor cells to an astroglial fate. *Neuron* 29, 45–55.
- Temple, S. (2001). The development of neural stem cells. *Nature* 414, 112–117.
- Vanderzalm, P., and Garriga, G. (2007). Losing their minds: Mena/VASP/EVL triple knockout mice. *Dev. Cell* 13, 757–758.
- Wei, Y., Nazari-Jahantigh, M., Chan, L., Zhu, M., Heyll, K., Corbalan-Campos, J., Hartmann, P., Thiemann, A., Weber, C., and Schober, A. (2013). The microRNA-342-5p fosters inflammatory macrophage activation through an Akt1- and microRNA-155-dependent pathway during atherosclerosis. *Circulation* 127, 1609–1619.
- Yoon, K., and Gaiano, N. (2005). Notch signaling in the mammalian central nervous system: insights from mouse mutants. *Nat. Neurosci.* 8, 709–715.
- Zhao, J., Huang, F., He, F., Gao, C., Liang, S., Ma, P., Dong, G., Han, H., and Qin, H. (2016). Forced activation of Notch in macrophages represses tumor growth by upregulating miR-125a and disabling tumor-associated macrophages. *Cancer Res.* 76, 1403–1415.
- Zheng, M.H., Shi, M., Pei, Z., Gao, F., Han, H., and Ding, Y.Q. (2009). The transcription factor RBP-J is essential for retinal cell differentiation and lamination. *Mol. Brain* 2, 38.

**Stem Cell Reports, Volume 8**

**Supplemental Information**

**miR-342-5p Regulates Neural Stem Cell Proliferation and Differentiation  
Downstream to Notch Signaling in Mice**

**Fang Gao, Yu-Fei Zhang, Zheng-Ping Zhang, Luo-An Fu, Xiu-Li Cao, Yi-Zhe Zhang, Chen-Jun Guo, Xian-Chun Yan, Qin-Chuan Yang, Yi-Yang Hu, Xiang-Hui Zhao, Ya-Zhou Wang, Sheng-Xi Wu, Gong Ju, Min-Hua Zheng, and Hua Han**

## Supplemental Information

### Supplemental data items

FigS1

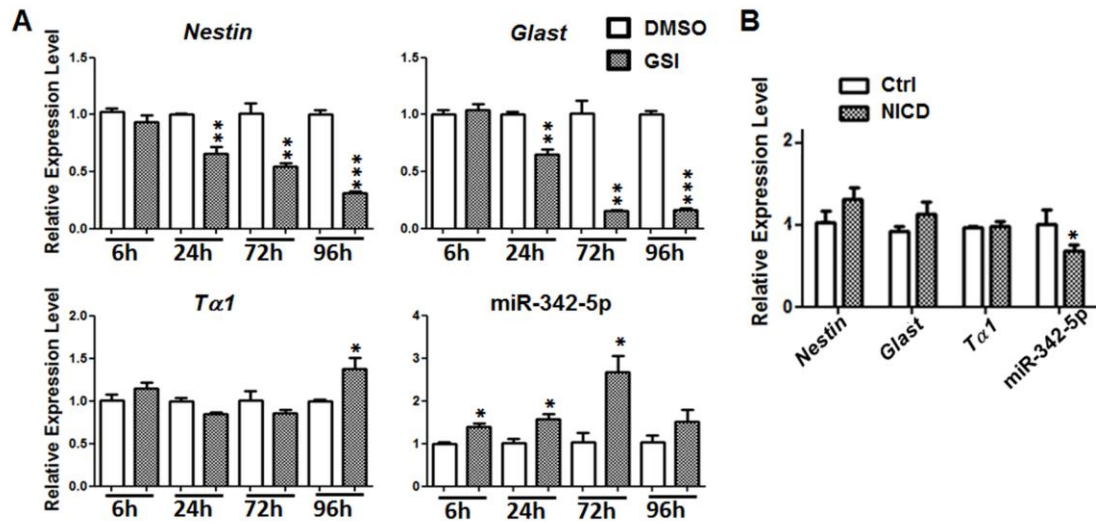

**Figure S1 (Related to Figure 1).** The expressions of *Nestin*, *Glact*, *Tα1* and miR-342-5p in neurospheres. (A) Primary neurospheres were cultured by using cells derived from wild type embryos (E15.5). Cells were treated with 75  $\mu$ M GSI for 6, 24, 72, and 96 h, and the expressions of *Nestin*, *Glact*, *Tα1* and miR-342-5p were examined by qRT-PCR. DMSO was used as a control. (RNA samples of each time point were derived from 3 different pairs of GSI and DMSO treated neurospheres.) (B) Neurospheres cultured from E15.5 *NesCre-ROSA-Stop<sup>f/+</sup>-NIC* (NICD) and *ROSA-Stop<sup>f/+</sup>-NIC* embryos (Ctrl) were harvested and total RNAs were extracted (RNA samples were derived from 3 different pairs of embryos). The expressions of *Nestin*, *Glact*, *Tα1* and miR-342-5p were determined by qRT-PCR. Bars = means  $\pm$  SD, \*,  $P < 0.05$ , \*\*,  $P < 0.01$ , \*\*\*,  $P < 0.001$ .



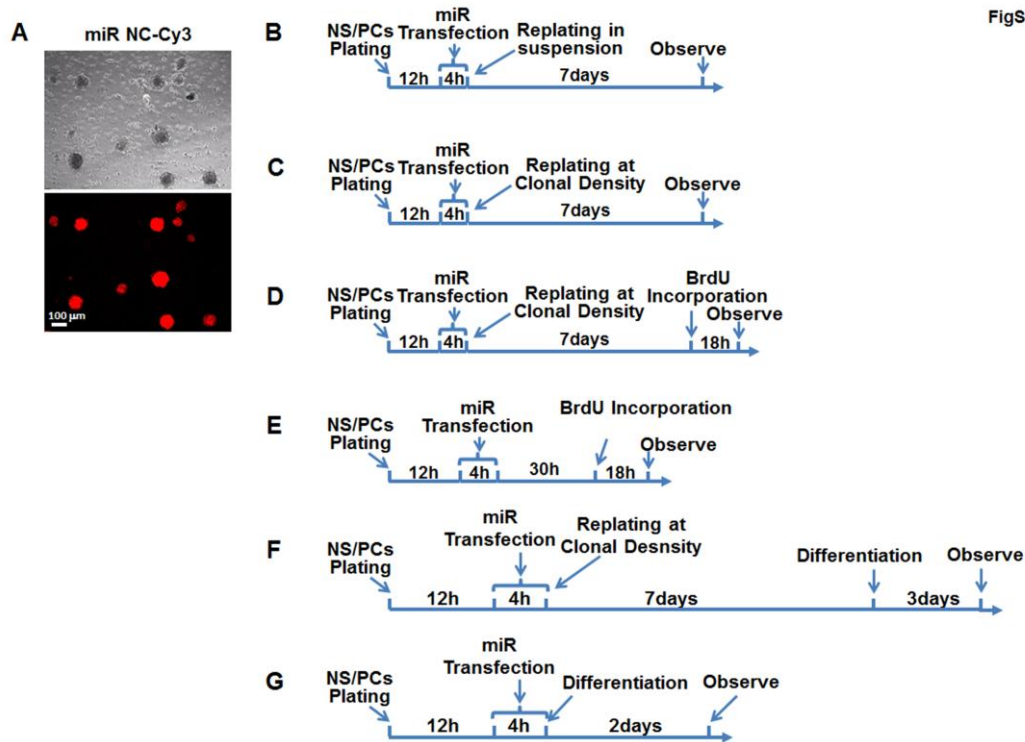

**Figure S2 (Related to Experimental Procedures). Transfection efficiency and diagrams of neurosphere assay and NS/PCs differentiation assay after miRNA transfection.** (A) Control nucleotide labeled with Cy3 was transfected into neurospheres to verify the transfection efficiency in our system. (B) For neurosphere assay, NS/PCs were replated in adherence and cultured for 12 h. Then after 4 h transfection of miR-342-5p mimics or the control oligonucleotides, adherent NS/PCs were replated in suspension, and the number of neurospheres were counted on the 7th day of culture. (C) For adherent NS/PC clone assay, NS/PCs were plated and transfected as above. Then NS/PCs were replated at clonal density described in Supplemental experimental procedures, and the numbers of adherent NS/PC colonies were counted on the 7th day of culture. (D) For BrdU incorporation in NS/PC colonies, transfection and replating methods were the same with adherent NS/PC clone assay. BrdU was incorporated for 18 h before analyses of the colonies. (E) For BrdU incorporation on dissociated NS/PCs, NS/PCs were transfected as above. BrdU was incorporated for 18 h before analyses, and cells were collected 48 h after transfection. (F) For NS/PC clone differentiation assay, transfection and replating method were the same with adherent NS/PC clone assay. After transfection, NS/PC clones were cultured for 7 days, and differentiation conditional medium was added for 72 h before analyses of the clones. (G) For dissociated NS/PC differentiation assay, NS/PCs were transfected as above. After transfection, differentiation conditional medium was added for 48 h before analyses of the cells.

FigS3

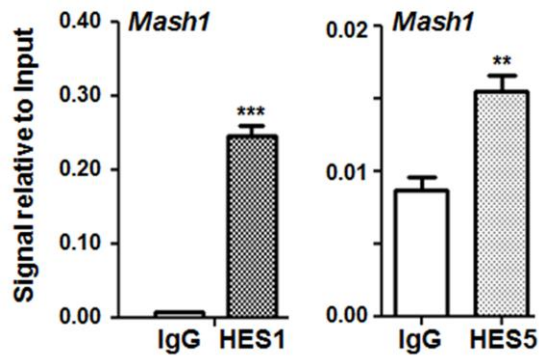

**Figure S3 (Related to Figure 2). ChIP assays.** Crosslinked chromatin samples were prepared from cultured primary NS/PCs (crosslinked chromatin samples derived from 3 independently cultured neurospheres), and immunoprecipitated with IgG and anti-HES1 or anti-HES5 antibody. After washing, the co-precipitated DNA was extracted and amplified by PCR primers targeting N-box sequence in the *Mash1* promoter as a positive control. Bars = means  $\pm$  SD, \*\*,  $P < 0.01$ , \*\*\*,  $P < 0.001$ .

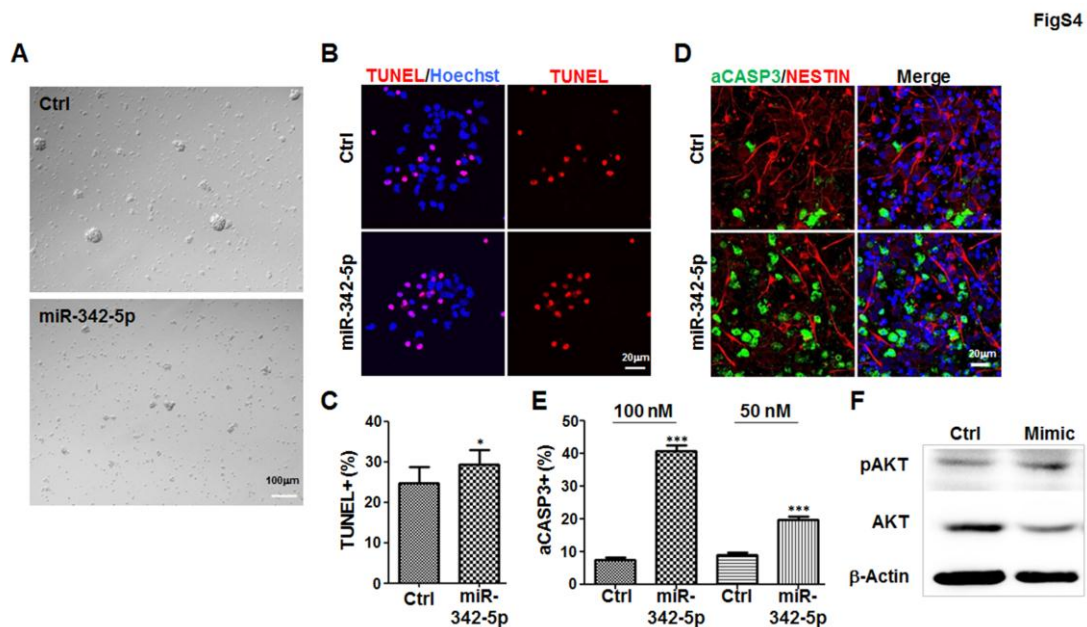

**Figure S4 (Related to Figure 3). Overexpression of miR-342-5p repressed the formation of neurospheres and induced apoptosis of NS/PCs.** (A) Single cell suspensions were prepared from GE of E15.5 embryos and cultured on PLL-coated dishes in the medium of DF12 supplemented with N2,

20 ng/ml bFGF and 20 ng/ml EGF. After 12 h, NS/PCs were transfected with 50 nM or 100 nM of miR-342-5p mimics or control oligonucleotides (Ctrl) (5 independent transfections performed). Cells were detached 4 h later and cultured under the neurosphere condition for 7 days. The cultures were photographed. **(B, C)** miR-342-5p increased the number of cells that underwent apoptosis. NS/PCs were transfected with miR-342-5p mimics and the control separately (5 independent transfections performed), and cultured adherently at clonal density for 7 days. Cells were performed TUNEL staining. Nuclei were counterstained with Hoechst. The percentage of TUNEL<sup>+</sup> cells within each colony was determined (50 colonies counted in each group). **(D, E)** The number of activated CASPASE3 (aCASP3) positive cells increased, but few of them showed NESTIN positive. NS/PCs were transfected with miR-342-5p mimics and the control as above (5 independent transfections performed), and cultured at normal density under the adherent condition for 48 h. Cells were stained with the anti-aCASP3 and anti-NESTIN antibodies. The percentage of aCASP3<sup>+</sup> cells was determined (10 fields counted in each group). The anti-NESTIN staining was used to outline NS/PCs specifically. **(F)** After miR-342-5p overexpression in NS/PCs (4 independent transfections performed), the total protein level of AKT was attenuated, and the phosphorylated protein level of AKT was approximately stable. Bars = means  $\pm$ SD, \*,  $P < 0.05$ , \*\*\*,  $P < 0.001$ .

**FigS5**

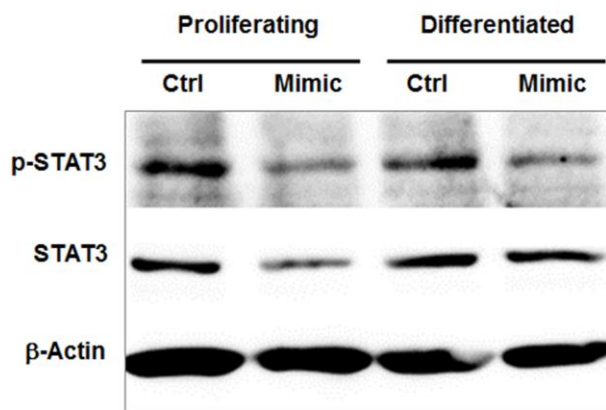

**Figure S5 (Related to Figure 6).** Differential protein levels of STAT3 after miR-342-5p overexpression. NS/PCs were cultured in proliferation condition or induced to differentiate for 48 hours (protein samples derived from 4 independent transfections). The protein level of STAT3 reduced in proliferating NS/PCs but not in differentiated cells after miR-342-5p overexpression. But the phosphorylated protein level of STAT3 decreased after miR-342-5p overexpression whether in proliferating or differentiated NS/PCs.

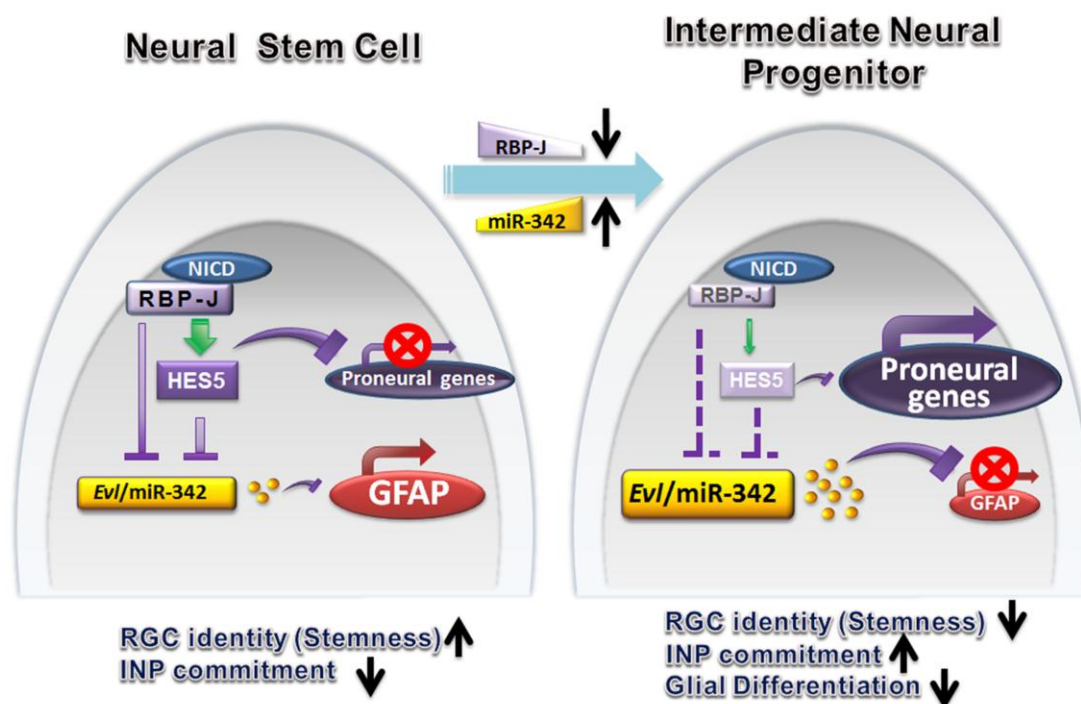

**Figure S6. Diagram of the functions of Notch/RBP-J signaling and miR-342-5p in NSCs and INPs.**

In NSCs where Notch signaling is activated, the level of *Evl/miR-342-5p* is repressed by RBP-J and HES5, and NSCs maintain undifferentiated RGC identity. As RBP-J dependent Notch signaling is becoming attenuated in NSCs with their development, miR-342-5p rises up and targets GFAP, which might result in NSCs losing their identity of radial glia and the potential into astrocytes. Meanwhile, the blunted RBP-J dependent Notch signaling releases the expression of proneural genes, and thus promotes the switch from multipotent NSCs into neurogenic INPs.

### Supplemental experimental procedures

#### Primary cell culture and miRNA transfection

NS/PCs were cultured by using the floating neurosphere culture and the adherent NS/PC culture (Curre et al., 2007; Sun et al., 2011). Single cell suspensions were obtained by mechanical dissociation of E15.5 embryonic brains under a stereomicroscope. For the neurosphere culture, cells were plated at a density of  $1 \times 10^5$  cells/ml in 24-well plates (0.4 ml/well). Otherwise for the adherent culture, cells

were plated at a density of  $5 \times 10^4$  cells/ml in poly-L-lysine (PLL)-coated 24-well plates (0.4 ml/well). In both of the conditions, cells were cultured in serum-free Dulbecco's modified Eagle's medium (DMEM)/F12 medium supplemented with 20 ng/ml recombinant human basic fibroblast growth factor (bFGF, R&D Systems), 20 ng/ml mouse submaxillary epidermal growth factor (EGF, R&D Systems), and the N-2 supplement (Gibco). To differentiate NS/PCs, the medium was changed to DMEM/F12 supplemented with  $0.5 \times N2$ , 5 ng/ml bFGF, 5 ng/ml EGF and 5% fetal bovine serum (FBS, Gibco). Otherwise, to differentiate NS/PC colonies, cells were plated on PLL-coated 35-cm<sup>2</sup> culture dishes at a very low density (Molofsky et al., 2003) (fewer than 100 clones per dish for a 7-day culture) and the medium was changed as described above. Primary oligodendrocytes, astrocytes, and neurons from neonatal or fetal rats were cultured as previously described (Zhao et al., 2012). To treat neurospheres with gamma-secretase inhibitor (GSI), DAPT (Abcam, Cambridge, MA) was added into the culture medium at a dosage of 75  $\mu$ M, with dimethyl sulfoxide (DMSO) as a control.

Cells were transfected with synthetic miR-342-5p mimics (aggggugcuaucugauugag), inhibitors (cucauacagauagcaccuccu) or their scrambled control oligonucleotides respectively (Ribobio) by using Lipofectamine 2000<sup>TM</sup> (Invitrogen) according to the manufacturer's instructions. Scrambled control oligonucleotides labeled with Cy3 (Ribobio) were transfected to test the transfection efficiency. And the different designs of experiments after the miRNA transfections were showed in Figure S2. For small interfering RNA (siRNA) transfection, primary NS/PCs were transfected with synthetic siHes5 (gucagcuaccugaaacacatt), or the scrambled control oligonucleotides respectively (Genepharma).

#### **miRNA expression profiling**

Total RNA was extracted from cells and purified by using miRNeasy micro kit (QIAGEN) following the manufacturer's instructions. Microarray hybridization, data collection, and analyses were fulfilled by custom service provided by ShanghaiBio, using an Agilent miRNA chip (Sanger miRBase v.12.0). Raw data were normalized by using MAS 5.0 algorithm (Gene Spring Software 11.0, Agilent Technologies). Hierarchical clustering of samples was performed by using Cluster 3.0 software.

#### **miRNA *in situ* hybridization**

The *in situ* hybridization of miR342-5p was performed by using locked nucleic acid (LNA) miRNA probe (Exiqon). Briefly, frozen sections of E14.5 brain were warmed up at room temperature, dried at 50 °C for 15 min and fixed in 4% paraformaldehyde (PFA) for 20 min. Sections were then treated with 10  $\mu$ g/mL proteinase K (Exiqon) for 12 min at room temperature and post-fixed with 4%

PFA for 15 min. After washing in phosphate-buffered saline (PBS), sections were prehybridized at 55 °C for 30 min in hybridization buffer (Exiqon). Then sections were hybridized for 3 h with 40 nM digoxigenin (DIG)-labeled LNA-modified probes (Exiqon) for miR-342-5p or a scrambled control. Sections were then washed in 5× SSC (once at hybridization temperature), 1× SSC (twice at hybridization temperature) and 0.2× SSC (twice at hybridization temperature then once at room temperature) sequentially for 5 min each. Sections were blocked with 2% bovine serum albumin (BSA) in PBS and incubated with alkaline phosphatase (AP)-conjugated anti-DIG antibody (Roche, 11093274910) overnight at 4 °C. The AP indicated miRNA signals were finally detected by freshly prepared AP substrate (nitroblue tetrazolium/5-bromo-4-chloro-3-indolyl-phosphate, NBT/BCIP).

### **Quantitative reverse transcription-polymerase chain reaction (qRT-PCR)**

Total RNA was isolated with miRNeasy micro kit (QIAGEN), and was used to synthesize cDNA with miScript II RT Kit (QIAGEN). Real-time PCR was performed using different kits on the ABI PRISM 7300 real-time PCR system. The miScript SYBR Green PCR Kit (QIAGEN) was used for the detection and quantification of miRNA, and the SYBR Premix EX Taq kit (Takara) for mRNA.

The primers used in this article for real-time PCR were as follows: miR-342-5p, 5'-CGGAGGGGTGCTATCTGTGATTGAG and the universal primer (QIAGEN); miR-342-3p, 5'-TCTCACACAGAAATCGCACCCGT and the universal primer (QIAGEN); RNU6, 5'-GGATGACACGCAAATTCGTGAAGC and the universal primer (QIAGEN); *Hes5*, 5'-AGTCCCAAGGAGAAAAACCGA and 5'-GCTGTGTTTCAGGTAGCTGAC; *Hes1*, 5'-GCAGACATTCTGAAATGACTGTGA and 5'-GAGTGCGCACCTCGGTGTTA; *Evl*, 5'-AGCCTGCTGGGAGTGTGAATG and 5'-ACCTTGTGCAGCTCCCGAAC; *Tuj1*, 5'-CCCAGCGGCAACTATGTAGG and 5'-CCAGACCGAACACTGTCCA; *Gfap*, 5'-TCTCGAATGACTCCTCCACTC and 5'-AAGCTCCGCCTGGTAGACAT; *Stat3*, 5'-CAATACCATTGACCTGCCGAT and 5'-GAGCGACTCAAACCTGCCCT; *Pdgfra*, 5'-GGAGACTCAAGTAACCTTGACAC and 5'-TCAGTTCTGACGTTGCTTTCAA; *Olig1*, 5'-GCAGCCACCTATCTCCTCATC and 5'-CGAGTAGGGTAGGATAACTTCGC; *Olig2*, 5'-GGGAGGTCATGCCTTACGC and 5'-CTCCAGCGAGTTGGTGAGC; *Tal1*, 5'-GTCCTGGACAGGATTCGCAAG and 5'-GCTCAACCACAGCAGTGGAAC; *Nestin*, 5'-TGAAAAGTTCCAGCTGGCTGT and 5'-AGTTCTCAGCCTCCAGCAGAGT; *Glast*, 5'-ACCAAAGCAACGGAGAAGAG and 5'-GGCATTCCGAAACAGGTAACCTC; *Gapdh*,

5'-TCGACAGTCAGCCGCATCTTCTT and 5'-GCGCCCAATACGACCAAATCC.

### ***In utero* electroporation**

*In utero* electroporation of mouse embryos was performed as described (Saito, 2006). Five square pulses of 50 milliseconds duration with 1 second intervals were applied using a BTX ECM830 pulse generator. Pulses with 40 V were applied to E15.5 embryos. pcDNA6.2-GW/EmGFP-miR-342-5p was constructed on the basis of linearized pcDNA6.2-GW/EmGFP-miR (Invitrogen). Negative control plasmid (pcDNA6.2-GW/EmGFP-negative control) coming with the kit was used as the control vector. Electroporated mouse embryos were harvested at E18.5 for further analyses.

### **Immunofluorescence**

For immunofluorescence, mice were perfused with 2 ml of 4% PFA in 0.1 M phosphate buffer (PB), pH7.4. The brain was removed and postfixed in 4% PFA for 1 h at 4 °C before being moved into 20% sucrose in 0.1 M PB overnight at 4 °C for cryoprotection. Frozen sections (14 µm) were cut with a cryostat and mounted on gelatinized slides. Cells on coverslips were fixed in 4% PFA for 30 min at room temperature. Samples were incubated with primary antibodies overnight at 4 °C, followed by Alexa Fluor® 488-conjugated or Alexa Fluor® 594-conjugated second antibodies (1:500, Jackson ImmunoResearch, 712-585-150, 711-545-152, 711-585-152, 705-545-147, 715-585-150). Samples were mounted in glycerol and visualized under a fluorescence microscope (BX51, Olympus) or a laser scanning confocal microscope (FV-1000, Olympus). Primary antibodies included rat anti-BrdU (1:250, Abcam, ab6326), goat anti-NESTIN (1:100, Santa Cruz, sc-21248), rabbit anti-Ki67 (1:200, Thermo Scientific, MA5-14520), rabbit anti-GFAP (1:1000, DAKO, Z0334), mouse anti-TUJ1 (1:500, R&D system, MAB1195), rabbit anti-PAX6 (1:50, Proteintech, 12323-1-AP), and rabbit anti-TBR2 (1:800, Abcam, ab23345).

For BrdU incorporation into cells, BrdU was added with a final concentration of 10 µM into the culture medium 18 h before the fixation of the cells. After the fixation, 2 N HCl was applied for 30 min at room temperature for permeabilization.

### **Terminal deoxynucleotidyl transferase-mediated dUTP nick end labeling (TUNEL)**

TUNEL staining was carried out following the instructions of the kit (Promega). Briefly, cells cultured on slides were fixed in 4% PFA. After washing with PBS, fixed cells were permeabilized with 0.2% Triton X-100. Then cells were equilibrated for 10 minutes at room temperature using the equilibration buffer within the kit. The reaction mix that contained the fluorescein-labeled nucleotide

mix and the terminal deoxynucleotidyl transferase was prepared and applied onto the cells for 60 minutes at 37 °C in a humidified chamber. Then the reaction was stopped and cells were washed with 2x SSC solution. After the nuclei were counterstained with Hoechst, slides were mounted and observed under a fluorescence microscope (BX51, Olympus) or a confocal microscope (FV-1000, Olympus). For CASPASE3 staining, adherent cells were stained with immunofluorescence methods as stated above. The primary antibodies used in Figure S4 were rabbit anti-active CASPASE3 (1:100, Sigma-Aldrich, C8487) and goat anti-NESTIN (1:100, Santa Cruz, sc-21248) antibodies.

### **Reporter assay**

pEFBOS-NICD and pCMV-RBP-J<sup>R218H</sup> (a dominant-negative RBP-J) were constructed previously (Chung et al., 1994; Kuroda et al., 2003). The *Evl* promoter fragment and its truncates were cloned by PCR, and inserted into pGL3-basic (Promega) to construct reporter genes (*Evl*-RepL, *Evl*-RepM, and *Evl*-RepS, Figure 2A). The two fragments of 3'-untranslated region (3'-UTR) of the mouse *Gfap* cDNA containing the two miR-342-5p recognition sites respectively, were amplified by PCR and subcloned into pMIR-REPORT (Ambion) to construct two pmiR-*Gfap* reporters. Reporters with mutations (pmiR-*Gfap*-mt) in the 3'-UTR corresponding to the seed sequence of miR-342-5p were generated by PCR.

NIH3T3 cells, HEK293 and PC12 cells were cultured in DMEM supplemented with 2 mM glutamine and 10% FBS. Cells were transfected with different combinations of reporters and expression vectors by using Lipofectamine 2000<sup>TM</sup> (Invitrogen), with a Renilla luciferase vector (phRL-TK, Promega) as an internal control. Cells were harvested 48 h after the transfection, and luciferase activity was measured with Dual Luciferase Reporter Assay using a Gloma X<sup>TM</sup> 20/20 Luminometer (Promega).

### **Chromatin immunoprecipitation (ChIP)**

ChIP assays were performed by using a kit from Millipore (Merck Millipore) according to the manufacturer's instructions. Briefly, cells were fixed in 1% formaldehyde, and cross-linked protein-DNA complexes were fragmented into 200 bp to 500 bp fragments by ultrasonic sound waves. Immunoprecipitation was performed by using an anti-HES1 antibody (H-20, Santa Cruz, sc-13844) and anti-HES5 antibody (M-104, Santa Cruz, sc-25395). Immune complexes were collected using protein G-Sepharose beads, washed, eluted and incubated for 5 h at 65 °C to reverse the cross-linking. DNA was extracted and analyzed by real-time PCR using the primers targeting the four putative



HES-binding sites as illustrated in Figure 2A: site 1, 5'-CACACCTCCCAATAGTGCCCTG and 5'-CCTCAGGAATGTAATAAAGCCACAGG; site 2, 5'-AATGTCTGAGGCCAAGTAATGTATAATG and 5'-ATCTGGTGCCCTCAACAGAACTAG; site 3, 5'-CTAGCCATTTGAAGCCAACCTCTC and 5'-CAGAAGAGTGGGAAACACCAAGTTC; and site 4, 5'-GAAAGCCGGTTCAGTAGGGCTC and 5'-AGAATCCCTGGTGGTGGAGGAG. Primers targeting the N-box sequence of *Mash1* promoter were used as a positive control: 5'-GAGGACTCAAGTTCTCATAACAGAG and 5'-AACTCTTGGGAAGTGGAGGG.

### **Western blot**

Whole cell lysates were extracted with the RIPA buffer (Beyotime) containing a protease inhibitor cocktail (Sigma-Aldrich). Protein concentration was determined with the BCA Protein Assay (Pierce). Samples were separated by SDS-PAGE, blotted onto polyvinylidene fluoride (PVDF) membranes and probed with primary antibodies, followed by horseradish peroxidase (HRP)-conjugated goat anti-mouse IgG (Boster Biotech, BA1050) or HRP-conjugated goat anti-rabbit IgG (Boster Biotech, BA1054). The primary antibodies used in this article included mouse anti-GFAP (1:2000, Sigma-Aldrich, G3893), mouse anti-TUJ1 (1:500, R&D system, MAB1195), rabbit anti-AKT (Ab-308) antibody (1:500, Signalway Antibody, 21055), rabbit anti-AKT (Phospho-Thr308) antibody (1:500, Signalway Antibody, 11055), rabbit anti-STAT3 (ab-727) antibody (1:500, Signalway Antibody, 21046), rabbit anti-STAT3 (Phospho-Tyr705) antibody (1:500, Signalway Antibody, 11045), and mouse anti- $\beta$ -Actin (1:5000, Sigma-Aldrich, A5441). Signals were developed with chemo-luminescent reagents (Pierce).

### **Statistics**

Statistical evaluation was performed with the Image Pro Plus 6.0 and Graph Pad Prism 5.0 softwares. Data were compared using Student's *t*-test or Paired *t*-test for two-group analysis, and using one-way ANOVA in conjunction with Bonferroni correction for multiple-group analysis.  $P < 0.05$  was considered statistically significant. Sections were collected from at least five pairs of mouse embryos. Similar sections between control and transfected groups were identified according to specific anatomical structures.

### **Supplemental references**

Currle, D.S., Hu, J.S., Kolski-Andreaco, A., and Monuki, E.S. (2007). Culture of mouse neural stem

cell precursors. *Journal of visualized experiments : JoVE*, 152.

Sun, T., Wang, X.J., Xie, S.S., Zhang, D.L., Wang, X.P., Li, B.Q., Ma, W., and Xin, H. (2011). A comparison of proliferative capacity and passaging potential between neural stem and progenitor cells in adherent and neurosphere cultures. *International journal of developmental neuroscience : the official journal of the International Society for Developmental Neuroscience* 29, 723-731.

Molofsky, A.V., Pardal, R., Iwashita, T., Park, I.K., Clarke, M.F., and Morrison, S.J. (2003). Bmi-1 dependence distinguishes neural stem cell self-renewal from progenitor proliferation. *Nature* 425, 962-967.

Zhao, X., Wu, J., Zheng, M., Gao, F., and Ju, G. (2012). Specification and maintenance of oligodendrocyte precursor cells from neural progenitor cells: involvement of microRNA-7a. *Molecular biology of the cell* 23, 2867-2878.

Saito, T. (2006). In vivo electroporation in the embryonic mouse central nervous system. *Nature protocols* 1, 1552-1558.

Chung, C.N., Hamaguchi, Y., Honjo, T., and Kawaichi, M. (1994). Site-directed mutagenesis study on DNA binding regions of the mouse homologue of Suppressor of Hairless, RBP-J kappa. *Nucleic acids research* 22, 2938-2944.

Kuroda, K., Han, H., Tani, S., Tanigaki, K., Tun, T., Furukawa, T., Taniguchi, Y., Kurooka, H., Hamada, Y., Toyokuni, S., *et al.* (2003). Regulation of marginal zone B cell development by MINT, a suppressor of Notch/RBP-J signaling pathway. *Immunity* 18, 301-312.
